1 **TITLE**

2 **Compound- and fiber type-selective requirement of AMPK $\gamma$ 3 for insulin-independent**  
3 **glucose uptake in skeletal muscle**

4

5 **AUTHORS**

6 Philipp Rhein<sup>1,2</sup>, Eric M. Desjardins<sup>3,4†</sup>, Ping Rong<sup>5†</sup>, Danial Ahwazi<sup>6</sup>, Nicolas Bonhore<sup>1</sup>, Jens Stolte<sup>1</sup>,  
7 Matthieu D. Santos<sup>7</sup>, Ashley J. Ovens<sup>8,9</sup>, Amy M. Ehrlich<sup>6</sup>, José L. Sanchez Garcia<sup>1</sup>, Qian Ouyang<sup>5</sup>,  
8 Mads F. Kjolby<sup>10</sup>, Mathieu Membrez<sup>1</sup>, Niels Jessen<sup>10</sup>, Jonathan S. Oakhill<sup>8,9</sup>, Jonas T. Treebak<sup>6</sup>,  
9 Pascal Maire<sup>7</sup>, John W. Scott<sup>9,11,12</sup>, Matthew J. Sanders<sup>1</sup>, Patrick Descombes<sup>1</sup>, Shuai Chen<sup>5</sup>, Gregory  
10 R. Steinberg<sup>3,4</sup>, Kei Sakamoto<sup>1,6\*</sup>

11

12 **AFFILIATIONS**

13 <sup>1</sup>Nestlé Research, Société des Produits Nestlé S.A., EPFL Innovation Park, Lausanne, 1015,  
14 Switzerland.

15 <sup>2</sup>School of Life Sciences, EPFL Innovation Park, Lausanne, 1015, Switzerland.

16 <sup>3</sup>Centre for Metabolism, Obesity, and Diabetes Research, McMaster University, Hamilton, ON,  
17 L8N3Z5, Canada

18 <sup>4</sup>Department of Medicine and Department of Biochemistry and Biomedical Sciences, McMaster  
19 University, Hamilton, ON, L8N3Z5, Canada

20 <sup>5</sup>MOE Key Laboratory of Model Animal for Disease Study, Model Animal Research Center, School  
21 of Medicine, Nanjing University, Nanjing, 210061, China

22 <sup>6</sup>Novo Nordisk Foundation Center for Basic Metabolic Research, University of Copenhagen,  
23 Copenhagen, 2200, Denmark

24 <sup>7</sup>Université de Paris, Institut Cochin, INSERM, CNRS. 75014 Paris, France.

25 <sup>8</sup>Metabolic Signalling Laboratory, St Vincent's Institute of Medical Research, School of Medicine,  
26 University of Melbourne, Fitzroy, VIC 3065, Australia.

27 <sup>9</sup>Mary MacKillop Institute for Health Research, Australian Catholic University, Fitzroy, VIC 3000,  
28 Australia.

29 <sup>10</sup>Department of Biomedicine, Aarhus University, Aarhus Denmark, Department of Clinical  
30 Pharmacology and Steno Diabetes Center Aarhus, Aarhus University Hospital, Aarhus, Denmark.

31 <sup>11</sup>Protein Chemistry and Metabolism Unit, St Vincent's Institute of Medical Research, Fitzroy, VIC  
32 3065, Australia.

33 <sup>12</sup>The Florey Institute of Neuroscience and Mental Health, Parkville, VIC 3052, Australia

34 **AUTHOR LIST FOOTNOTES**

35 †These authors contributed equally.

36 \*Corresponding author

37

38 **CORRESPONDING AUTHOR CONTACT INFORMATION**

39 Kei Sakamoto

40 Novo Nordisk Foundation Center for Basic Metabolic Research, University of Copenhagen,

41 Blegdamsvej 3B, Copenhagen DK-2200, Denmark. E-mail: [kei.sakamoto@sund.ku.dk](mailto:kei.sakamoto@sund.ku.dk)

42 Phone: (+45) 9356 3553

43

44

45 **ABSTRACT**

46 **Objective:** The metabolic master-switch AMP-activated protein kinase (AMPK) mediates insulin-  
47 independent glucose uptake in muscle and regulates the metabolic activity of brown and beige  
48 adipose tissue (BAT). The regulatory AMPK $\gamma$ 3 isoform is uniquely expressed in skeletal muscle  
49 and also potentially in BAT. Here, we investigated the role that AMPK $\gamma$ 3 plays in mediating skeletal  
50 muscle glucose uptake and whole-body glucose clearance in response to small-molecule  
51 activators that act on AMPK via distinct mechanisms. We also assessed if  $\gamma$ 3 plays a role in  
52 adipose thermogenesis and browning.

53 **Methods:** Global AMPK $\gamma$ 3 knockout (KO) mice were generated. A systematic whole-body, tissue  
54 and molecular phenotyping linked to glucose homeostasis was performed in  $\gamma$ 3 KO and wild type  
55 (WT) mice. Glucose uptake in glycolytic and oxidative skeletal muscle *ex vivo*, as well as blood  
56 glucose clearance in response to small molecule AMPK activators that target nucleotide-binding  
57 domain of  $\gamma$  subunit (AICAR) and allosteric drug and metabolite (ADaM) site located at the  
58 interface of the  $\alpha$  and  $\beta$  subunit (991, MK-8722) were assessed. Oxygen consumption,  
59 thermography, and molecular phenotyping with a  $\beta$ 3-adrenergic receptor agonist (CL-316,243)  
60 treatment were performed to assess BAT thermogenesis, characteristics and function.

61 **Results:** Genetic ablation of  $\gamma$ 3 did not affect body weight, body composition, physical activity, and  
62 parameters associated with glucose homeostasis under chow or high fat diet.  $\gamma$ 3 deficiency had no  
63 effect on fiber-type composition, mitochondrial content and components, or insulin-stimulated  
64 glucose uptake in skeletal muscle. Glycolytic muscles in  $\gamma$ 3 KO mice showed a partial loss of  
65 AMPK $\alpha$ 2 activity, which was associated with reduced levels of AMPK $\alpha$ 2 and  $\beta$ 2 subunit isoforms.  
66 Notably,  $\gamma$ 3 deficiency resulted in a selective loss of AICAR-, but not MK-8722-induced blood  
67 glucose-lowering *in vivo* and glucose uptake specifically in glycolytic muscle *ex vivo*. We detected  
68  $\gamma$ 3 in BAT and found that it preferentially interacts with  $\alpha$ 2 and  $\beta$ 2. We observed no differences in  
69 oxygen consumption, thermogenesis, morphology of BAT and inguinal white adipose tissue  
70 (iWAT), or markers of BAT activity between WT and  $\gamma$ 3 KO mice.

71 **Conclusions:**

72 These results demonstrate that  $\gamma$ 3 plays a key role in mediating AICAR- but not ADaM site binding  
73 drug-stimulated blood glucose clearance and glucose uptake specifically in glycolytic skeletal  
74 muscle. We also showed that  $\gamma$ 3 is dispensable for thermogenesis and browning of iWAT.

75 **KEY WORDS**

76 AMP-activated protein kinase; 5-aminoimidazole-4-carboxamide riboside; MK-8722; glucose  
77 uptake; TBC1D1; Brown adipose tissue

## 78 1. INTRODUCTION

79 AMP-activated protein kinase (AMPK) is an evolutionary conserved energy sensor that functions to  
80 maintain energy homeostasis through coordinating metabolic pathways [1; 2]. AMPK exists as  
81 complexes of three subunits; a catalytic  $\alpha$  and two regulatory  $\beta$  and  $\gamma$  subunits. Each exists as  
82 multiple isoforms ( $\alpha1/\alpha2$ ,  $\beta1/\beta2$ ,  $\gamma1/\gamma2/\gamma3$ ), generating up to twelve possible combinations [1].  
83 AMPK heterotrimers are active when a conserved threonine (Thr172) residue within the activation  
84 loop of the  $\alpha$  subunit kinase domain is phosphorylated [3]. The major upstream kinase  
85 phosphorylating Thr172 in metabolic tissues (e.g., muscle, liver) is a complex containing LKB1 [4;  
86 5]. The  $\gamma$ -subunits contain four tandem cystathionine  $\beta$ -synthase (CBS) motifs that bind adenine  
87 nucleotides. Binding of ADP and/or AMP to CBS motifs causes conformational changes that  
88 promote net Thr172 phosphorylation [6-8]. Moreover, the binding of AMP, but not ADP, further  
89 increases AMPK activity by direct allosteric stimulation [6]. Prodrugs of AMP-mimetics such as 5-  
90 aminoimidazole-4-carboxamide riboside (AICAR) have been widely used as pharmacological  
91 AMPK activators that target the CBS motifs [9]. Proof of concept preclinical studies demonstrated  
92 that AICAR treatment improved insulin sensitivity in animal models of insulin resistance [10].  
93 However, AICAR produces numerous AMPK-independent metabolic actions [11]. For example, we  
94 have recently demonstrated that AICAR suppresses hepatic glucose production independently of  
95 AMPK [12] through inhibition of fructose-1,6-bisphosphatase-1, an AMP-sensitive enzyme involved  
96 in gluconeogenesis, *in vivo* [13]. We also showed that AICAR regulated >750 genes in AMPK-null  
97 mouse primary hepatocytes [14].

98 A nucleotide-independent regulation of AMPK was discovered when a novel small-  
99 molecule activator, A-769662, was identified [15] and mechanism of action explored [16-18]. The  
100 crystallographic structures of AMPK trimeric complexes revealed that A-769662 and 991 (another  
101 activator, also known as ex229) bind in a pocket termed allosteric drug and metabolite (ADaM) site  
102 located at the interface of the  $\alpha$  subunit (kinase domain N-lobe) and  $\beta$  subunit (carbohydrate  
103 binding module) [9; 19; 20]. A-769662 was subsequently found to be selective for the AMPK $\beta1$ -  
104 containing complexes [17] and failed to stimulate AMPK-dependent glucose uptake due to lack of  
105 potency against  $\beta2$ -containing complexes that are prevalent in skeletal muscle [21]. We and others  
106 have shown that 991, and its two related benzimidazole derivatives with improved bioavailability  
107 (MK-8722, PF-739), are potent and highly-specific AMPK activators [14; 22; 23]. They activate  
108 both  $\beta1$ - and  $\beta2$ -containing complexes (thereby activating all twelve possible human AMPK  
109 complexes) and have been shown to stimulate glucose uptake in skeletal muscle and lower blood  
110 glucose levels *in vivo* [22; 24]. Notably, administration of PF-739 resulted in attenuated blood  
111 glucose reduction in skeletal muscle-specific but not in liver-specific double knockout of  
112 AMPK $\alpha1/\alpha2$  [23].

113 AMPK isoform expression varies among different cell and tissue types, with  $\alpha 1$ ,  $\beta 1$ , and  $\gamma 1$   
114 appearing the most ubiquitously expressed. Conversely,  $\gamma 3$  is selectively expressed in skeletal  
115 muscles containing a high proportion of glycolytic/fast-twitch fibers such as extensor digitorum  
116 longus (EDL) muscle [22; 25-27]. Interestingly, even though skeletal muscle expresses multiple  
117 isoforms, assays of immunoprecipitated isoforms reveal the  $\alpha 2\beta 2\gamma 1$  and  $\alpha 2\beta 2\gamma 3$  complexes  
118 account for 90% (of which  $\alpha 2\beta 2\gamma 3$  accounts for 20%) of the total AMPK trimers in mouse EDL  
119 skeletal muscle [21]. Loss of expression/function of  $\alpha 2$ ,  $\beta 2$  or  $\gamma 3$  is sufficient to ablate AICAR-  
120 induced glucose uptake in isolated skeletal muscle *ex vivo* [25; 28-32].

121 In addition to its established metabolic roles in skeletal muscle [33; 34], AMPK also plays a  
122 vital role in regulating the development of brown adipose tissue (BAT), maintenance of BAT  
123 mitochondrial function, and browning of white adipose tissue (WAT) [35]. Adipose-specific  
124 AMPK $\beta 1/\beta 2$ -null (ad-AMPK KO) mice had a profound defect in thermogenesis [36], and both cold  
125 exposure and acute treatment with the  $\beta 3$ -adrenergic receptor agonist (CL-316,243) in the ad-  
126 AMPK KO mice yielded subnormal increments in oxygen consumption and BAT temperature  
127 responses (likely related to impairments in BAT mitochondrial function). A high-throughput screen  
128 of protein kinases using a combination of RNAi-mediated knockdown and pharmacological  
129 inhibitors identified AMPK as a prominent kinase that promoted the formation of UCP1-abundant  
130 brown adipocytes *in vitro* [37]. Proof of concept experiments *in vivo* demonstrate that daily  
131 treatment of diabetic ZDF rats with an AMPK activator (C163, for 6 weeks) increased the formation  
132 of brown adipocytes [37]. Intriguingly, transcripts of the *Prkg3* (AMPK $\gamma 3$  gene) were identified in  
133 brown adipocyte precursors at intermediate levels, and RNAi-mediated knockdown of *Prkg3* was  
134 sufficient to profoundly block the brown adipocyte formation without affecting general adipose  
135 differentiation [37]. These results prompted us to assess if  $\gamma 3$  plays a role in adipose  
136 thermogenesis and browning *in vivo*.

137 We hypothesized that  $\gamma 3$ -containing complexes play an important role for insulin-  
138 independent and AMPK activator-mediated glucose uptake in skeletal muscle and for regulating  
139 BAT thermogenesis. To test this hypothesis, we generated  $\gamma 3$  KO mice and determined the effect  
140 of AICAR and the ADaM site binding drugs (991, MK-8722) on glucose uptake in glycolytic and  
141 oxidative skeletal muscles *ex vivo* and also blood glucose kinetics *in vivo*. In addition, we probed  
142 BAT function using the  $\beta 3$ -AR agonist CL-316,243. Strikingly, we found that  $\gamma 3$  deficiency resulted  
143 in a selective loss of AICAR-, but not 991/MK-8722-induced blood glucose clearance *in vivo* and  
144 glucose uptake specifically in glycolytic muscle *ex vivo*. We also found that  $\gamma 3$  is not required for  
145 the acute induction of UCP1-mediated non-shivering thermogenesis in the BAT, for the adaptive  
146 response to non-shivering thermogenesis or the browning of WAT.

147

## 148 2. MATERIALS AND MTHODS

### 149 2.1. Materials

150 5-aminoimidazole-4-carboxamide riboside (AICAR) was purchased from Apollo Scientific  
151 (OR1170T; Bredbury, United Kingdom). 991 (5-[[6-chloro-5-(1-methylindol-5-yl)-1H-benzimidazol-  
152 2-yl]oxy]-2-methyl-benzoic acid) (CAS#: 129739-36-2) was synthesized by Spirochem (Basel,  
153 Switzerland) as previously described [1]. Protein G Sepharose and P81 paper were purchased  
154 from GE Healthcare (Chicago, IL, USA). [ $\gamma$ - $^{32}$ P]-ATP was purchased from PerkinElmer (Waltham,  
155 MA, USA). The substrate peptide AMARA was synthesized by GL Biochem (Shanghai, China). All  
156 other reagents were from MilliporeSigma (Burlington, MA, USA) if not otherwise stated. Lists of  
157 primary and secondary antibodies are in the **Supplementary Table 1 and 2**.

158

### 159 2.2. Animal ethics and models

160 Animal experiments were approved by the internal and local ethics committee and conducted in  
161 accordance with the European Convention for the Protection of Vertebrate Animals used for  
162 Experimental and Other Scientific Purposes. Protocols used were approved by the Service  
163 Vétérinaire Cantonal (Lausanne, Switzerland) under licenses VD3332 and VD3465, and also  
164 approved by an ethical committee (Com'Eth, CE17) registered at the French Ministry of Research  
165 under the reference: 10261, as well as were in accordance with McMaster Animal Care Committee  
166 guidelines (AUP #: 16-12-41, Hamilton, ON), and the Ethics Committees at Nanjing University with  
167 involved personnel having personal licenses from the regional authority. The generation of a  
168 constitutive *Prkag3*<sup>-/-</sup> (AMPK $\gamma$ 3<sup>-/-</sup>) mice was performed by Taconic Biosciences as described in  
169 **Supplementary Figure 1**. The AMPK $\alpha$ 1f/f and AMPK $\alpha$ 2f/f mice were as previously described [38],  
170 and obtained from the Jackson Laboratory (Bar Harbor, ME, USA). These two strains were used to  
171 derive AMPK $\alpha$ 1f/f/ $\alpha$ 2f/f mice that were then bred with the Mlc1f-Cre mice to obtain the  
172 AMPK $\alpha$ 1f/f/ $\alpha$ 2f/f - Mlc1f-Cre mice. The resultant AMPK $\alpha$ 1f/f/ $\alpha$ 2f/f - Mlc1f-Cre mice are the  
173 AMPK $\alpha$ 1/ $\alpha$ 2 skeletal muscle-specific knockout mice. TBC1D1 S231A knock-in mice have been  
174 described [39]. All these lines are on C57BL6 background. The animals were kept and maintained  
175 according to local regulations under a light-dark cycle of 12 hours and had free access to a  
176 standard chow diet. Male mice ranging 10-16 weeks of age were used for experiments otherwise  
177 stated. High fat diet (60% kcal% fat) was obtained from Research Diet (RD 12492).

178

### 179 2.3. Analysis of body composition and plasma hormone levels

180 Body composition (fat content, lean tissues and free body fluid) was assessed using the Minispec  
181 analyser (Bruker) by Nuclear Magnetic Resonance (NMR) technology. The test was conducted on  
182 conscious fed mice. Blood was collected at the indicated age by retro orbital puncture under



183 isoflurane anesthesia at noon on mice fasted for 4 hours. Plasma insulin and leptin levels were  
184 measured on a BioPlex analyser (BioRad) using the Mouse Metabolic Magnetic Hormone  
185 Magnetic Bead panel kit (MilliporeSigma).

186

#### 187 *2.4. Oral glucose tolerance test*

188 Mice were fasted overnight (16 hours) and a bolus of glucose solution (2 g/kg body weight) was  
189 administered via oral gavage. Blood glucose collected from tail vein was measured at different time  
190 points over 120 min using blood glucose monitor and glucose test strips (Roche Diagnostics, Accu-  
191 Chek).

192

#### 193 *2.5. Preparation of mouse tissue extracts for protein analysis*

194 Mouse tissue were dissected and immediately frozen in liquid nitrogen. The tissues were  
195 homogenized in ice-cold lysis buffer (270 mM sucrose, 50 mM Tris-HCl (pH 7.5), 1 mM EDTA, 1  
196 mM EGTA, 1% (w/v) Triton X-100, 20 mM glycerol-2-phosphate, 50 mM NaF, 5 mM Na<sub>4</sub>P<sub>2</sub>O<sub>7</sub>, 1  
197 mM DTT, 0.1 mM PMSF, 1 mM benzamidine, 1 µg/ml microcystin-LR, 2 µg/ml leupeptin, and 2  
198 µg/ml pepstatin A) using a tissue lyser (Tissue Lyser II; Qiagen). Lysates were centrifuged at  
199 21,300 g for 15 min and protein concentration from the supernatant was determined using  
200 Bradford reagent (23200, ThermoFisher) and bovine serum albumin (BSA) as standard. The  
201 supernatants were stored in aliquots in -80°C freezer until subsequent analysis.

202

#### 203 *2.6. Immunoblotting*

204 Protein extracts were denatured in Laemmli buffer at 95°C for 5 min. 20 µg of protein was  
205 separated by SDS-PAGE on 4-12% gradient gels (NW04127, ThermoFisher) and transferred onto  
206 nitrocellulose membranes (#926-31090, LiCOR). Membranes were blocked for 1 hour at room  
207 temperature in LiCOR blocking buffer (#927-60001, LiCOR). The membranes were subsequently  
208 incubated in TBST (10 mM Tris (pH 7.6), 137 mM NaCl, and 0.1% (v/v) Tween-20) containing 5%  
209 (w/v) BSA and the primary antibody overnight at 4°C. After extensive washing, the membranes  
210 were incubated for 1 hour in either HRP-conjugated or LiCOR secondary antibodies diluted  
211 1:10,000. Signal imaging was performed either using enhanced chemiluminescence (ECL) reagent  
212 (GE Healthcare) or a LiCOR Odyssey CLx imaging system. Densitometry for ECL blots was  
213 performed using Image J Software (NIH). Due to sample limitation (from the incubated muscle  
214 tissue samples), we also utilized automated capillary Western Blot system Sally Sue  
215 (ProteinSimple, San Jose, CA, USA). Experiments were performed according to the  
216 manufacturer's protocol using the indicated standard reagents for the Sally Sue system (SM-S001,  
217 ProteinSimple). Briefly, all samples were first diluted to 2 mg/ml in lysis buffer and then further

218 diluted to 0.5 mg/ml in 0.1% SDS. Following the manufacturer's instructions for sample  
219 preparation, this resulted in an assay protein concentration of 0.4 mg/ml.

220

### 221 *2.7. Immunoprecipitation and in vitro AMPK activity assay*

222 Lysates of muscle (200 µg) or BAT (1,000 µg) were incubated on a rotating platform at 4°C  
223 overnight with a mix of 5 µl protein G-sepharose and the indicated antibodies. The beads were  
224 pelleted at 500 g for 1 min and initially washed twice with 0.5 mL lysis buffer containing 150 mM  
225 NaCl and 1 mM DTT and subsequently washed twice with the same amount of buffer A [50 mM  
226 HEPES (pH 7.4), 150 mM NaCl, 1 mM EGTA and 1 mM DTT]. The AMPK complexes were either  
227 eluted with Laemmli buffer for immunoblot analysis or taken directly for AMPK activity  
228 measurement. The AMPK activity assay was performed by incubating the beads (immune-  
229 complexes) for 30 min at 30°C on a heated shaker in buffer A with additional 10 mM Mg<sup>2+</sup> and 100  
230 µM ATP in presence of 200 µM AMARA peptide (AMARAASAAALARRR) and 1 µCi of [ $\gamma$ -<sup>32</sup>P] ATP  
231 [22]. Reactions were stopped by spotting the reaction mix onto P81 filter paper and washing in 75  
232 mM phosphoric acid. The P81 papers were dried after three washes and the <sup>32</sup>P incorporation into  
233 the substrate peptide measured by Cherenkov counting (5 min) using a scintillation counter (Tri-  
234 Carb 2810TR, PerkinElmer).

235

### 236 *2.8. Citrate synthase activity assay*

237 Protein extracts (10 µg) (using the same lysis buffer described above) was assayed in duplicates  
238 using a citrate synthase assay kit (CS0720, MilliporeSigma) according to the manufacturer's  
239 instruction using recombinant citrate synthase as positive control.

240

### 241 *2.9. Analysis of gene expression and mitochondrial DNA copy number using quantitative real-time 242 PCR (qPCR)*

243 To perform a relative quantification of mRNA levels of the AMPK subunit isoforms in mouse  
244 skeletal muscle tissues, reverse transcription and qPCR was performed as described [14]. All the  
245 primers and sequences are listed in the **Supplementary Table 3**. Relative mRNA quantities were  
246 calculated for triplicate muscle samples from 4-5 animals and normalized using the three reference  
247 genes *Hprt1* (hypoxanthine ribosyltransferase, HPRT), *GusB* (beta-glucuronidase) and *Pgk1*  
248 (Phosphoglycerate Kinase 1). Real-time qPCR in brown adipose tissue was performed separately  
249 as described [36]. Relative gene expression was calculated using the comparative Ct (2- $\Delta$ Ct)  
250 method, where values were normalized to a reference gene (*Ppia*).

251 To relatively quantify the amount of mtDNA present per nuclear genome by qPCR, mtDNA (16S,  
252 ND4) and nuclear DNA (PMP22, Titin) primers and probes were used, the sequences of which are



253 shown in **Supplementary Table 3**. The relative mt copy number was determined based on the  
254 relative abundance of nuclear and mtDNA, calculated as average of the two targets respectively.  
255 The relative abundance is then expressed by  $\Delta CT$  or  $CT(nDNA) - CT(mtDNA)$  and displayed as  
256 fold change of copy number of mtDNA per nuclear genome compared to the WT muscle.

#### 257 258 *2.10. Immunofluorescence for fiber type determination and fiber size*

259 For immunostaining against Myh4, Myh2, Myh7 and Laminin, mouse hindlimbs (no skin) without  
260 fixation were embedded with Tissue-TEK OCT (Sakura Finetek, Netherlands) and directly frozen in  
261 cold isopentane pre-cooled in liquid nitrogen as described [40]. Hindlimb cross sections were  
262 prepared using a cryostat (Leica 3050s) with a thickness of 10  $\mu m$ . The cross sections were  
263 washed 3 times for 5 min with PBS and then incubated with blocking solution (PBS and 10% goat  
264 serum) for 30 min at room temperature. Sections were incubated overnight with primary antibody  
265 diluted in PBS + 10% goat serum solution at 4°C and washed as described above. The sections  
266 were incubated with secondary antibody, diluted in PBS + 10% goat serum solution for 1 hour at  
267 room temperature. Sections were further washed and mounted with Mowiol solution and a glass  
268 coverslip. Images were collected with a microscope (Olympus BX63F) and a camera (Hamamatsu  
269 ORCA-Flash 4.0). Images were analyzed with ImageJ (NIH). Fiber boundaries were defined by the  
270 laminin signal and myosin Myh7 (type I), Myh2 (type IIA) and Myh4 (type IIB) heavy chains were  
271 quantified. Remaining unlabeled fibers were included for total fiber number and individual  
272 proportions of type I, type IIA and type IIB of that total number calculated.

#### 273 274 *2.11. Ex vivo skeletal muscle incubation and analysis of glucose uptake*

275 Animals were anesthetized by Avertin [2,2,2-Tribromoethanol (Sigma-Aldrich #T48402) and 2-  
276 Methyl-2-butanol 99% (Sigma-Aldrich #152463)] via intraperitoneal injection, and EDL or soleus  
277 muscles were rapidly dissected and mounted in oxygenated (95% O<sub>2</sub> and 5% CO<sub>2</sub>), and warmed  
278 (30°C) Krebs-Ringer buffer in a myograph system (820MS DMT, Denmark). The respective  
279 muscles were incubated as described [22; 41] in the presence of the indicated drug or vehicle for  
280 50 min. 2-deoxy-[<sup>3</sup>H] glucose uptake was measured during the last 10 min of the incubation as  
281 described [22; 39].

#### 282 283 *2.12. AICAR and MK-8722 tolerance test*

284 Access of the mice to food was restricted for 3 hours (07:00-10:00) prior to the experiment. AICAR  
285 (250 mg/kg body weight) or vehicle (water) was injected intraperitoneally and blood glucose levels  
286 were monitored for 120 min using the Contour XT glucometer (Bayer, Leverkusen) and single use  
287 glucose sensors (Ascensia, Basel). MK-8722 tolerance was tested by oral administration of either

288 MK-8722 (10 or 30 mg/kg body weight) or vehicle (0.25% (w/v) methylcellulose, 5% (v/v)  
289 Polysorbate 80, and 0.02% (w/v) sodium lauryl sulfate in deionized water) [24]. Blood glucose  
290 measurement was performed as described above for AICAR.

291

### 292 *2.13. ZMP and adenine nucleotide measurements*

293 Muscle tissues were lysed in 200  $\mu$ l cold 0.5 M perchloric acid. Extracts were collected and  
294 clarified at 14,000 rpm for 3 min. 100  $\mu$ l clarified lysate was neutralized with 25  $\mu$ l cold 2.3 M  
295  $\text{KHCO}_3$  and incubated on ice for 5 min. Samples were centrifuged at 14,000 rpm for 3 min. ZMP  
296 were measured by LC-MS/MS with modifications to our previously described method [42]. Both LC  
297 and MS instruments were controlled and managed with the Analyst 1.7.1 software (AB Sciex). The  
298 autosampler was set at 4°C and column oven set at 30°C, which housed a 150 mm (length) x 0.5  
299 mm (inner diameter) Hypercarb 3  $\mu$ m porous graphitic carbon column (Thermo Fisher Scientific).  
300 The LC solvent system comprised of 50 mM triethylammonium bicarbonate buffer (TEAB,  
301 MilliporeSigma) pH 8.5 in pump A, and acetonitrile with 0.5 % trifluoroacetic acid (TFA; Sigma-  
302 Aldrich) in pump B. A flow rate of 400  $\mu$ l/min was used throughout a gradient program consisting of  
303 0 % B (2 min), 0 to 100 % B (10 min), 100 % B (3 min), 0 % B (2 min). Data was analyzed with  
304 MultiQuant 3.0.2 software (AB Sciex) using area under the LC curve. Calibration curves were  
305 determined by linear regression of the peak area of a ZMP standard curve and were required to  
306 have a correlation coefficient ( $R^2$ ) of  $> 0.98$ . Adenine nucleotides and adenylate energy charge  
307 were measured by LC-MS as described [43].

308

### 309 *2.14. Adipose tissue histology*

310 Tissues were fixed in 10% formalin for 24-48 hours at 4°C and processed for paraffin embedding  
311 and hematoxylin and eosin staining by the core histology laboratory at the McMaster Immunology  
312 Research Centre (Hamilton, Canada).

313

### 314 *2.15. Infrared thermography*

315 UCP1-mediated thermogenesis was assessed in 14-week-old male wild-type and  $\gamma 3$  KO mice as  
316 described [44]. Briefly, mice were anaesthetized with an intraperitoneal injection of 0.5 mg/g body  
317 weight Avertin (2,2,2-Tribromoethanol dissolved in 2-methyl-2-butanol; MilliporeSigma) then, 2 min  
318 later, injected with either saline or the highly selective  $\beta 3$ -adrenergic receptor agonist CL 316,243  
319 (Tocris, Bristol, United Kingdom). Mice were subsequently placed dorsal side up onto an enclosed  
320 stationary treadmill to measure oxygen consumption ( $\text{VO}_2$ ) with a Comprehensive Laboratory  
321 Animal Monitoring System (Columbus Instruments, OH, USA) and 18 min after the second  
322 injection a static dorsal thermal image was taken with an infrared camera (FLiR Systems,

323 Wilsonville, OR, USA). Serum samples were collected via tail-nick just after the infrared image was  
324 taken and non-esterified free fatty acid (NEFA) concentration was determined using manufacturer  
325 instructions with a two-step kit (NEFA-HR 2, WAKO).

326

### 327 *2.16. Metabolic monitoring*

328 Metabolic monitoring was performed as described [45] in a Comprehensive Laboratory Animal  
329 Monitoring System. For the chronic 5-day CL 316,243 challenge, mice were injected  
330 intraperitoneally with saline or CL 316,243 (first 4 days 0.5 mg/kg and last day 1.0 mg/kg) at 09:30  
331 hours and measurements for  $VO_2$  were calculated 6 hours post-injection. Mice were euthanized 24  
332 hours after the last injection.

333

### 334 *2.17. Statistical analysis*

335 Data are reported as mean  $\pm$  SEM and statistical analysis was performed using GraphPad Prism  
336 software. As indicated in the respective figure legends, differences between only two groups were  
337 analyzed using an unpaired two-tailed Student's *t*-test and for multiple comparisons one-way  
338 analysis of variance (ANOVA) with Bonferroni *post hoc* test or repeated measures two-way  
339 ANOVA was used. Statistical significance was accepted at  $P < 0.05$ .

340

## 341 **3. RESULTS**

### 342 ***3.1. A genetic/constitutive loss of the AMPK $\gamma$ 3 reduced AMPK $\alpha$ 2 and $\beta$ 2 protein abundance*** 343 ***in mouse glycolytic skeletal muscle.***

344 We generated constitutive AMPK $\gamma$ 3 KO mice through flanking exons 5-10 of *Prkag3* gene with  
345 LoxP sites (**Supplementary Fig. 1A**). This is expected to cause a loss-of-function of the *Prkag3*  
346 gene by deleting the nucleotide binding cystathionine  $\beta$ -synthase (CBS)-2 domain and parts of the  
347 CBS-1 and -3 domains and by generating a frame shift from exon 4 to exon 11 (premature stop  
348 codon in exon 12). In addition, the resulting transcript may be a target for non-sense mediated  
349 RNA decay and thereby may not be expressed at significant level. In support of this, we were  
350 unable to detect faster migrating polypeptides using the antibody raised against residues 44–64  
351 (within exon 1-3) of the mouse  $\gamma$ 3 (**Supplementary Fig. 1B**).  $\gamma$ 3 homozygous KO ( $\gamma$ 3<sup>-/-</sup>) mice were  
352 born at expected Mendelian frequency (data not shown). Food intake and spontaneous physical  
353 activity, as well as oxygen consumption were similar between wild-type (WT) and  $\gamma$ 3 KO mice  
354 (**Supplementary Fig. 1C-E**).

355 We first confirmed a complete loss of  $\gamma$ 3 protein and its associated AMPK catalytic activity in  
356 tissues harvested from  $\gamma$ 3 KO mice (**Fig. 1A, B**). Expression of  $\gamma$ 3 is restricted to skeletal muscles

357 containing a high proportion of glycolytic/fast-twitch fibers [22; 25]. In line with this, we observed  
358 that  $\gamma 3$  and its associated AMPK activity were predominantly detected in glycolytic gastrocnemius  
359 (GAS) and extensor digitorum longus (EDL) muscles in WT mice. A modest expression of  $\gamma 3$  and  
360 its associated AMPK activity were detected in soleus muscle (which contains a high proportion of  
361 oxidative/slow-twitch fibers) from WT mice when  $\gamma 3$  proteins were enriched by immunoprecipitation  
362 prior to the immunoblotting (**Fig. 1A, B**). We detected a faint band immuno-reactive to the  $\gamma 3$   
363 antibody in liver lysates from both WT and  $\gamma 3$  KO mice (**Fig. 1A**, middle panel). We confirmed that  
364 the observed band was non-specific as it was readily detected in IgG control samples (**Fig. 1A**,  
365 lower panel) and only a negligible background  $\gamma 3$ -associated AMPK activity was detected in liver  
366 (and also heart) lysates in both WT and  $\gamma 3$  KO mice (**Fig. 1B**). Next, we assessed if loss of  $\gamma 3$   
367 affected AMPK $\alpha 1$ - and  $\alpha 2$ -containing complex activity in GAS muscle. As illustrated in **Fig 1C and**  
368 **D**, we observed that while AMPK $\alpha 1$  activity was unaltered, AMPK $\alpha 2$  activity was reduced (~50%).  
369 Since we and others have shown that  $\gamma 3$  predominantly interacts with  $\alpha 2$  and  $\beta 2$  [21; 22] to form a  
370 stable trimeric  $\alpha 2\beta 2\gamma 3$  complex, we hypothesized that a constitutive loss of  $\gamma 3$  would cause  
371 reduced expressions of  $\alpha 2$  and  $\beta 2$  due to their destabilization as monomers. To test this  
372 hypothesis, we performed an analysis of AMPK subunit/isoform abundance in both glycolytic (EDL  
373 and GAS) and oxidative (soleus) muscles in WT and  $\gamma 3$  KO mice (**Fig. 1E-G**). We previously  
374 performed an extensive antibody validation for all AMPK $\alpha\beta\gamma$  isoforms using individual isoform-  
375 specific KO mouse tissues as negative controls and also reported that  $\gamma 2$  proteins (UniProt ID:  
376 Q91WG5 isoform A) were not detectable in mouse skeletal muscles [22]. Immunoblot analysis  
377 revealed that protein levels of  $\alpha 2$ , total AMPK $\alpha$  using a pan  $\alpha 1/\alpha 2$  antibody, and  $\beta 2$  isoforms were  
378 selectively reduced (~20-30%) in EDL and GAS (**Fig. 1E, F**), but not in soleus (**Fig. 1G**), of  $\gamma 3$  KO  
379 as compared to WT mice. There was no compensatory increase in  $\gamma 1$  isoform in  $\gamma 3$  KO muscles.  
380 To examine if the reduced protein abundance of  $\alpha 2$  and  $\beta 2$  was due to decreased mRNA  
381 expression of the *Prkaa2* and *Prkab2* (the genes encoding AMPK $\alpha 2$  and  $\beta 2$ , respectively) in the  $\gamma 3$   
382 KO mice, we performed qPCR analyses (**Fig. 1H, I**). We confirmed that *Prkag3* mRNA expression  
383 was undetectable in skeletal muscle from  $\gamma 3$  KO mice, and observed that there were no differences  
384 in mRNA expressions of other AMPK subunit/isoforms in GAS (**Fig. 1H**) or soleus (**Fig. 1I**)  
385 between WT and  $\gamma 3$  KO mice. Taken together, we have demonstrated that a genetic/constitutive  
386 loss of AMPK $\gamma 3$  causes reductions of AMPK $\alpha 2$  and  $\beta 2$  proteins without affecting their mRNA  
387 expressions in glycolytic skeletal muscle.

388

389 **3.2. AMPK $\gamma 3$  deficiency has no impact on mitochondrial content and components or fiber-**  
390 **type composition in skeletal muscle.**

391 A loss-of-function of skeletal muscle AMPK is associated with reduced mitochondrial content and  
392 function [45-48]. Interestingly, a transgenic mouse model overexpressing  $\gamma 3$  mutant (R225Q, a  
393 gain-of-function mutation), was associated with higher mitochondrial content and increased  
394 amount of a marker of the oxidative capacity (succinate dehydrogenase) in individual muscle fibers  
395 of the white portion of GAS [49]. Nevertheless,  $\gamma 3$  deficiency did not cause alterations in  
396 mitochondrial content or other parameters in GAS muscle [49]. However, the previously generated  
397  $\gamma 3$  deficient mice did not exhibit significantly reduced expression or activity of AMPK $\alpha 2$  [25], the  
398 predominant  $\alpha$ -catalytic isoform in skeletal muscle. In the current study we wanted to address  
399 whether  $\gamma 3$  deficiency, coupled to a partial loss of AMPK $\alpha 2$  activity (**Fig. 1D**), had an impact on  
400 mitochondrial parameters in both glycolytic (EDL) and oxidative (soleus) skeletal muscle. We  
401 observed no differences in mitochondrial DNA copy number (**Fig. 2 A, B**), citrate synthase activity  
402 (**Fig. 2 C, D**), or components of the mitochondrial respiratory chain complex (**Fig. 2E, F**) in soleus  
403 or EDL muscles of WT and  $\gamma 3$  mice. Fiber-type analysis of hindlimb cross sections using  
404 immunofluorescence revealed no differences in myosin heavy chain isoform composition in EDL or  
405 soleus muscles between the genotypes (**Fig. 2G, H**). We also observed no difference in skeletal  
406 muscle fiber size (cross sectional area) between the genotypes (**Fig. 2I**). Collectively, we show that  
407 constitutive  $\gamma 3$  deficiency does not affect mitochondrial content, respiratory chain complex  
408 expression, or fiber type composition in both glycolytic and oxidative skeletal muscle.

409

### 410 **3.3. AMPK $\gamma 3$ KO mice exhibit normal glucose homeostasis on chow and in response to high** 411 **fat diet (HFD) feeding.**

412 Transgenic mice overexpressing the  $\gamma 3$  mutant (R225Q) exhibit an increase in muscle lipid  
413 oxidation and are protected against HFD-induced insulin resistance in skeletal muscle [25]. In the  
414 current study, we examined if  $\gamma 3$  deficiency affected glucose homeostasis under standard chow  
415 and in response to HFD feeding. Body weight and composition were similar between WT and  $\gamma 3$   
416 KO mice during both chow and HFD feeding periods (**Fig. 3A, B**). We observed similar levels of  
417 plasma insulin and leptin on chow diet between WT and  $\gamma 3$  KO mice, with their levels increased in  
418 a comparable manner for both genotypes in response to HFD feeding (**Fig. 3C, D**). Consistent with  
419 these results, we observed comparable fasted blood glucose levels and no difference in glucose  
420 tolerance between the genotypes irrespective of the diets (**Fig. 3E**). To complement these *in vivo*  
421 results, we assessed insulin signaling and glucose uptake in isolated EDL muscle *ex vivo*. As  
422 shown in **Fig. 3F**, basal glucose uptake and Akt phosphorylation were comparable between WT  
423 and  $\gamma 3$  KO mice and insulin equally stimulated both parameters in both genotypes. We also  
424 confirmed that there was no difference in the expression of GLUT4 and hexokinase II in EDL



425 muscle between WT and  $\gamma 3$  KO mice (**Fig. 3F**). Taken together, these results suggest that  $\gamma 3$  is  
426 dispensable for maintenance of glucose homeostasis on chow and in response to HFD.

427

### 428 **3.4. AMPK $\gamma 3$ deficiency causes attenuated AICAR-stimulated glucose uptake in glycolytic** 429 **skeletal muscle ex vivo and blood glucose lowering in vivo.**

430 AICAR-stimulated glucose uptake in skeletal muscle requires functional AMPK [34]. Consistent  
431 with previous studies [30; 39], AICAR promoted glucose uptake robustly in EDL (~2.5-fold) and  
432 modestly in soleus (~1.6-fold) *ex vivo* in WT mice (**Fig. 4A, B**). Interestingly, we observed that  
433 AICAR-stimulated glucose uptake was profoundly reduced in EDL, but not in soleus, in  $\gamma 3$  KO mice  
434 (**Fig. 4A, B**). To examine if a loss of  $\gamma 3$  affected AICAR-induced AMPK activity, we measured  
435 phosphorylation of ACC and TBC1D1, established surrogate markers of *cellular* AMPK activity in  
436 muscle. As shown in **Fig. 4C-F**, phosphorylation of ACC and TBC1D1 was increased in both EDL  
437 and soleus in response to AICAR in WT mice. The AICAR-mediated increase in phosphorylation of  
438 ACC and TBC1D1 was reduced in EDL, but not in soleus, in  $\gamma 3$  KO mice (**Fig. 4C-F**). We  
439 confirmed that there is no sex-dependent AICAR effect, as AICAR-stimulated glucose uptake was  
440 similarly reduced in EDL muscle from female  $\gamma 3$  KO mice (data not shown). We wanted to explore  
441 if a partial loss of  $\gamma 3$  results in a reduction of AICAR-stimulated glucose uptake in EDL.

442 Heterozygous  $\gamma 3^{+/-}$  mice had ~50% reduction in  $\gamma 3$  expression in GAS, but the expression of total  
443 AMPK $\alpha$ ,  $\alpha 2$  and  $\beta 1/\beta 2$  was not reduced (**Supplementary Fig. 2A, B**). Incubation of EDL with  
444 AICAR *ex vivo* resulted in similar increases in  $\gamma 3$ -associated activity and glucose uptake, as well as  
445 phosphorylation of ACC and TBC1D1 in both WT and heterozygous  $\gamma 3^{+/-}$  mice (**Supplementary**  
446 **Fig. 2C-G**).

447 We next wanted to determine if  $\gamma 3$  deficiency affected the hypoglycemic effects of AICAR *in vivo*.  
448 We utilized partially fasted animals (3-hour fast, 07:00-10:00), as the AICAR-induced reduction of  
449 blood glucose in overnight fasted (16 hours) mice was predominantly caused by the suppression of  
450 hepatic glucose output [13]. After administration of a bolus of AICAR (250 mg/kg body weight, i.p.)  
451 or vehicle, we monitored blood glucose kinetics for 2 hours in WT and  $\gamma 3$  KO mice. As shown in  
452 **Fig. 4G**, we observed that the blood glucose-lowering action of AICAR was blunted (40 and 60 min  
453 time points) in  $\gamma 3$  KO compared to WT mice. We confirmed that ZMP content in GAS muscle  
454 following AICAR administration was comparably increased between the two genotypes (**Fig. 4H**).  
455 Additionally, AICAR did not affect adenylate energy charge in GAS from both genotypes  
456 (**Supplementary Fig. 2H**). Collectively, these results suggest that  $\gamma 3$  (i.e.  $\gamma 3$ -containing AMPK  
457 complex(es)) plays an important role in AICAR-mediated glucose uptake and disposal in glycolytic  
458 skeletal muscles.



459 **3.5. ADaM site-targeted activators normally stimulate glucose uptake in skeletal muscle and**  
460 **lower blood glucose levels in AMPK $\gamma$ 3 KO mice.**

461 The ADaM site-binding pan AMPK activator, 991, robustly stimulates glucose uptake in isolated  
462 mouse skeletal muscle tissues *ex vivo* [22; 50]. We initially confirmed that the 991-stimulated  
463 glucose uptake was fully dependent on AMPK in both EDL and soleus using skeletal muscle-  
464 specific AMPK $\alpha$ 1/ $\alpha$ 2 double KO (m- $\alpha$ 1/ $\alpha$ 2 DKO) mice (**Fig. 5A, B**). Immunoblot analysis validated  
465 AMPK $\alpha$  deficiency and profound decreases in phosphorylation of ACC and TBC1D1 in the  
466 absence or presence of 991 in both EDL and soleus in the m- $\alpha$ 1/ $\alpha$ 2 DKO mice (**Fig. 5C, D**). We  
467 next assessed the effect of 991, MK-8722 (a structural analogue of 991 [24]), and AICAR on  $\gamma$ 3-  
468 associated AMPK activity in isolated muscle from WT and  $\gamma$ 3 KO *ex vivo*. As shown in **Fig 5E**,  $\gamma$ 3-  
469 associated activity was increased (~1.5-2-fold) with 991 or MK-8722 and robustly increased (~3-  
470 fold) with AICAR in EDL from WT mice. Despite minimal  $\gamma$ 3-associated activity detectable in  
471 soleus, the activity was increased ~2-fold with 991 in WT mice (**Fig. 5F**). As expected, there was  
472 no  $\gamma$ 3-associated AMPK activity present in skeletal muscle from  $\gamma$ 3 KO mice (**Fig. 5E, F**). In  
473 contrast to the effect of AICAR, incubation of EDL with 991 or MK-8722 resulted in comparable  
474 increases in glucose uptake in WT and  $\gamma$ 3 KO mice (**Fig. 5G**). We also observed that 991-  
475 stimulated glucose uptake was similar in soleus between WT and  $\gamma$ 3 KO mice (**Fig. 5H**). 991  
476 and/or MK-8722 increased phosphorylation of ACC and TBC1D1 in EDL and soleus with no  
477 differences in the levels of phosphorylation between WT and  $\gamma$ 3 KO mice (**Fig. 5I-L**). Consistent  
478 with the *ex vivo* results, oral administration of MK-8722 (10 or 30 mg/kg body weight) resulted in a  
479 comparable blood glucose-lowering kinetics *in vivo* between WT and  $\gamma$ 3 KO mice (**Fig. 5M** and  
480 **Supplementary Fig. 3**). Taken together, we demonstrate that  $\gamma$ 3 is dispensable for the stimulation  
481 of glucose uptake and disposal in skeletal muscle in response to 991 or MK-8722 (ADaM site  
482 targeted compounds).

483  
484 **3.6. AMPK $\gamma$ 3 protein and its associated AMPK trimeric complexes are present in mouse**  
485 **BAT.**

486 *Prakg3* mRNA are expressed in mouse brown adipose precursors [37], however whether  $\gamma$ 3  
487 proteins are expressed and exist as part of functional AMPK trimeric complexes in BAT is  
488 unknown. We initially performed a comparison of AMPK subunit/isoform protein expression profiles  
489 between skeletal muscle (EDL) and BAT from WT mice, which revealed distinct profiles between  
490 the two tissues (**Fig. 6A**). Compared to skeletal muscle, BAT expresses relatively higher and lower  
491 amounts of  $\alpha$ 1 and  $\alpha$ 2, respectively. The total AMPK $\alpha$  content (assessed by a pan-AMPK $\alpha$   
492 antibody) was similar between the tissues. However, the efficacy of the isoform-specific detection

493 of  $\alpha 1$  and  $\alpha 2$  proteins by this antibody is unknown. We observed a divergent expression pattern of  
494 the  $\beta$  isoforms between the tissues. While skeletal muscle predominantly expresses  $\beta 2$ , BAT  
495 predominantly expresses  $\beta 1$  (**Fig. 6A**). In contrast,  $\gamma 1$  expression is similar between the tissues.  
496 We next immunoprecipitated  $\gamma 3$  from BAT (and GAS muscle as control) and performed either  $\gamma 3$ -  
497 associated AMPK kinase activity assay or immunoblot analysis to identify  $\alpha$  and  $\beta$  subunit isoforms  
498 interacting with  $\gamma 3$ . As shown in **Fig. 6B**, we detected  $\gamma 3$  and its associated AMPK activity in BAT  
499 from WT, but not from  $\gamma 3$  KO mice. Interestingly,  $\gamma 3$  preferentially interacts with  $\alpha 2$  and  $\beta 2$  (**Fig.**  
500 **6C**), whereas  $\gamma 1$  interacts with  $\alpha 1/\alpha 2$  and preferentially with  $\beta 1$  (**Fig. 6D**). We also observed that  $\gamma 3$   
501 deficiency in BAT did not affect abundance of other AMPK subunit isoforms (**Fig. 6E**). Collectively,  
502 we provide evidence that AMPK $\gamma 3$  protein is expressed in BAT and it forms functional complexes  
503 by mainly interacting with  $\alpha 2$  and  $\beta 2$ .

504

### 505 **3.7. AMPK $\gamma 3$ is not required for the acute induction of UCP1-mediated non-shivering** 506 **thermogenesis in the BAT.**

507 AMPK plays an important role for BAT formation [37] and thermogenesis in response to cold  
508 exposure and  $\beta 3$ -adrenoreceptor ( $\beta 3$ -AR) stimulation in rodents [36]. We probed BAT function  
509 using the  $\beta 3$ -AR agonist CL-316,243 (CL), which increases thermogenesis through a UCP1-  
510 dependent mechanism [44]. A single injection of CL increased oxygen consumption and  
511 interscapular BAT surface area temperature in both WT and  $\gamma 3$  KO mice, but there were no  
512 differences between the genotypes (**Fig. 7A-C**). Furthermore, CL increased serum non-esterified  
513 free fatty acid concentration to a similar extent in both WT and  $\gamma 3$  KO mice, indicating no major  
514 alterations in lipolysis (**Fig. 7D**).

515

### 516 **3.8. AMPK $\gamma 3$ is not required for the adaptive response to non-shivering thermogenesis or** 517 **the browning of inguinal white adipose tissue (iWAT).**

518 We next performed injections of CL for 5 consecutive days to determine if  $\gamma 3$  is required for the  
519 adaptive response to non-shivering thermogenesis or the browning of iWAT. Daily treatment of  
520 mice with CL increased oxygen consumption without altering body or BAT weight, but did reduce  
521 iWAT weight similarly in both WT and  $\gamma 3$  KO mice (**Fig. 7E-H**). Furthermore,  $\gamma 3$  KO mice treated  
522 with CL for 5 days had similar morphological changes in BAT – with smaller lipid droplets – and the  
523 appearance of multilocular adipocytes within iWAT (**Fig. 7I, J**). Lastly, CL treatment increased  
524 UCP1 expression (at both transcript and protein levels), as well as levels of other thermogenic and  
525 mitochondrial genes such as *Cox2*, *Cox8b* and *Cidea* in both WT and  $\gamma 3$  KO mice (**Fig. 7K-M**).

526 These results demonstrate that  $\gamma 3$  is dispensable for  $\beta$ -adrenergic-induced remodeling of BAT and  
527 iWAT in mice.

528

#### 529 **4. DISCUSSION**

530 AMPK has been considered a promising target for the treatment of the metabolic syndrome over  
531 the last decades. The identification of new mechanisms for drug-targeting on AMPK (i.e. discovery  
532 of ADaM site) has advanced the development of more potent and selective AMPK activators with  
533 improved bioavailability [9]. Recent proof of concept studies in rodents and non-human primates  
534 have compellingly demonstrated that oral administration of pan AMPK activators (e.g. MK-8722,  
535 PF-739) targeting the ADaM site can promote glucose uptake in skeletal muscle, and ameliorate  
536 insulin resistance and reduce hyperglycemia without causing hypoglycemia [23; 24]. Since  $\gamma 3$  is  
537 exclusively expressed in skeletal muscle, understanding of the physiological roles that  $\gamma 3$  plays in  
538 regulating glucose metabolism/homeostasis is important for the development of skeletal muscle-  
539 selective AMPK activators. In addition, a recent *in vitro* study reports that  $\gamma 3$  plays a role in BAT  
540 development [37] prompted us to investigate the role for  $\gamma 3$  in thermogenesis and adipose  
541 browning *in vivo*. In the current study we found that genetic ablation of  $\gamma 3$  resulted in a selective  
542 loss of AICAR-, but not MK-8722-induced blood glucose-lowering *in vivo* and glucose uptake  
543 specifically in glycolytic muscles *ex vivo*. We also found that  $\gamma 3$  is dispensable for the acute  
544 induction of UCP1-mediated non-shivering thermogenesis in BAT or the adaptive response to non-  
545 shivering thermogenesis and the browning of WAT.

546 We observed that the levels of  $\alpha 2$  and  $\beta 2$  isoforms were reduced (~20-30%) in glycolytic  
547 (GAS and EDL), but not in oxidative (soleus) muscle in  $\gamma 3^{-/-}$  KO compared to WT mice. In soleus, a  
548 previous study reported that  $\gamma 3$  was only detectable in a complex with  $\alpha 2$  and  $\beta 2$ , but relative  
549 amount of this complex was shown to be only 2% and >90% of  $\alpha 2$  and  $\beta 2$  forms complexes with  $\gamma 1$   
550 [21; 34]. In contrast,  $\alpha 2$  and  $\beta 2$  form complexes with  $\gamma 1$  (70%) and  $\gamma 3$  (20%), respectively in EDL  
551 muscle. Therefore, it is plausible that a constitutive deficiency of  $\gamma 3$  resulted in a partial loss of  $\alpha 2$   
552 and  $\beta 2$  proteins due to degradation of excess monomeric forms of  $\alpha 2$  and  $\beta 2$  in GAS/EDL, but not  
553 in soleus muscle. Consistent with this notion, a constitutive deletion of  $\gamma 1$ , a ubiquitously expressed  
554  $\gamma$  isoform across tissues, resulted in much more profound reductions of all its interacting AMPK  
555 isoforms ( $\alpha 1$ ,  $\alpha 2$ ,  $\beta 1$  and  $\beta 2$ ) in mouse tissues including skeletal muscle [51]. Even though  
556 previous work reported that  $\gamma 3$  deficiency did not affect the levels of other AMPK isoforms in GAS  
557 muscles, there was an ~25% reduction of  $\alpha 2$  protein expression in GAS muscles from  $\gamma 3$  KO  
558 compared to WT mice [25]. It might be the case that it did not reach statistical significance due to

559 insufficient power. In line with this assumption, phosphorylation of AMPK $\alpha$  (Thr172) was reduced  
560 in EDL from the same  $\gamma$ 3 KO mouse model (compared to WT) [52].

561 A complete loss of functional  $\alpha$ 2 or  $\beta$ 2 was associated with ablated glucose uptake with  
562 AICAR in mouse skeletal muscle *ex vivo* [28; 30; 31]. To our knowledge, whether a partial loss of  
563  $\alpha$ 2 and/or  $\beta$ 2 (e.g. in heterozygous  $\alpha$ 2<sup>+/-</sup> or  $\beta$ 2<sup>+/-</sup> mice) reduces glucose uptake in EDL with AICAR  
564 *ex vivo* is unknown. However, we have previously demonstrated that a profound reduction (>60%)  
565 of  $\alpha$ 2 activity observed in EDL of the LKB1 hypomorphic mice resulted in comparable AICAR-  
566 stimulated glucose uptake and ACC phosphorylation compared to WT mice [4]. Moreover, here we  
567 report that 991/MK-8722 stimulates glucose uptake in EDL muscle from the  $\gamma$ 3 KO mice.  
568 Therefore, a partial reduction of  $\alpha$ 2/ $\beta$ 2 expression (~20-30%) is unlikely to be responsible for the  
569 decrease in AICAR-stimulated glucose uptake in  $\gamma$ 3-deficient EDL muscle.

570 One of the major findings of this study was that  $\gamma$ 3-deficiency caused blunted glucose  
571 uptake in EDL *ex vivo* and hypoglycemic response *in vivo* with AICAR, but not with ADaM site-  
572 targeted compounds (i.e. 991, MK-8722). This was particularly intriguing as both AICAR and  
573 991/MK-8722 require intact AMPK catalytic activity to promote glucose uptake in skeletal muscle  
574 tissues/cells [23; 24; 28-32; 45; 50], and we report that both AICAR and 991/MK-8722 increased  
575  $\gamma$ 3-associated AMPK activity. The dose of AICAR (2mM) utilized had a more potent effects on  $\gamma$ 3-  
576 associated activity (~3-fold increase) as compared to 10  $\mu$ M 991/MK-8722 (~1.5-2-fold). However,  
577 the results from this assay do not reflect cellular activity, as the *in vitro* kinase assay following  
578 immunoprecipitation accounts for covalently-regulated activity (e.g. phosphorylation), but not  
579 allosterically-regulated (i.e. by AMP/ZMP, 991/MK-8722) activity. Judging from phosphorylation  
580 levels of ACC and TBC1D1, AICAR and 991/MK-8722 comparably increased cellular AMPK  
581 activity in skeletal muscle. However notably, compound-induced phosphorylation of ACC and  
582 TBC1D1 *ex vivo* was only reduced in EDL when treated with AICAR, but not with 991/MK-8722, in  
583  $\gamma$ 3 KO compared to WT. This raises the possibility that AICAR preferentially activates  $\gamma$ 3- over  $\gamma$ 1-  
584 containing complex(es). Concordantly, AMP appears to have stronger binding affinity to nucleotide  
585 binding site 3 (in the CBS domain) of  $\gamma$ 3 (~40  $\mu$ M) than  $\gamma$ 1 (~300-600  $\mu$ M) *in vitro* (using bacterial  
586 AMPK-complex preparations) [53]. On the other hand, another *in vitro* study reported that while  
587 AMP potently (allosterically) activated  $\alpha$ 2 $\beta$ 2 $\gamma$ 1 (~3-fold), it barely activated  $\alpha$ 2 $\beta$ 2 $\gamma$ 3 (<15%) complex  
588 [54]. Thus, how these *in vitro* results can be interpreted and translated into cellular context is  
589 unclear. The  $\gamma$ -isoforms all contain a highly conserved C-terminal region harboring the four CBS  
590 domains. Conversely, the  $\gamma$ 2 and  $\gamma$ 3 isoforms contain long N-terminal extensions that are not  
591 present in the  $\gamma$ 1 isoform. These N-terminal extensions display no apparent sequence  
592 conservation between isoforms. To date, there are no crystal structures available for  $\gamma$ 2- or  $\gamma$ 3-

593 containing AMPK trimeric complexes and it is unknown whether the N-terminal extensions of  $\gamma 2$  or  
594  $\gamma 3$  play any functional role. A recent study using cell-based assays demonstrated that  $\alpha 2\beta 2\gamma 1$  and  
595  $\alpha 2\beta 2\gamma 3$  complexes were similarly activated in response to 991 treatment, whereas  $\alpha 2\beta 2\gamma 2$   
596 complexes exhibited a greater activation (compared to  $\alpha 2\beta 2\gamma 1/\alpha 2\beta 2\gamma 3$  complexes) [55]. The  
597 authors proposed that the effect is mediated by the N-terminal region of  $\gamma 2$  and is due to enhanced  
598 protection of AMPK $\alpha$  Thr172 from dephosphorylation. Whether N-terminal extension of  $\gamma 3$  has any  
599 specific role to play in muscle cells/tissue and in AMP/ZMP-mediated regulation of AMPK and  
600 glucose uptake in skeletal muscle is unknown.

601 Even though  $\gamma 3$  deficiency was associated with reduced AICAR-stimulated glucose uptake  
602 in EDL muscle *ex vivo*, we provide the first evidence that the AICAR-induced blood glucose  
603 lowering effect *in vivo* was robustly reduced in  $\gamma 3$  KO compared to WT mice, which was quite  
604 similar to AMPK $\alpha 2$  KO and  $\alpha 2$  kinase-dead (KD) expressing transgenic mice [28; 30]. Indeed,  $\alpha 2$   
605 KO and KD mice still showed decreases in blood glucose in response to an acute injection of  
606 AICAR, which is most likely due to the inhibitory effect of AICAR on hepatic glucose production  
607 through ZMP-dependent inhibition of fructose 1,6-bisphosphatase 1 [13; 56]. MK-8722 has been  
608 shown to cause hypoglycemic effect through the stimulation of glucose uptake in both glycolytic  
609 (GAS) and oxidative (soleus) muscle *in vivo* [24]. In contrast to AICAR, but consistent with *ex vivo*  
610 data, we provided evidence that MK-8722-induced skeletal muscle glucose uptake and blood  
611 glucose-lowering effects were comparable between  $\gamma 3$  KO and WT mice. This compellingly  
612 demonstrates that  $\gamma 3$  is dispensable (in other words  $\gamma 1$  is sufficient) in stimulating glucose uptake in  
613 skeletal muscle in response to pan-AMPK ADaM site-binding activators.

614 Evidence suggests that AMPK plays a vital role in regulating the development of BAT,  
615 maintenance of BAT mitochondrial function, and browning of WAT [35]. We provided genetic  
616 evidence that mice lacking functional AMPK specifically in adipocytes, through an inducible  
617 deletion of  $\beta 1$  and  $\beta 2$ , were intolerant to cold and resistant to  $\beta$ -adrenergic stimulation of brown  
618 and beige adipose tissues [36]. Similar findings were also observed in AMPK  $\alpha 1/\alpha 2$  KO mice [57].  
619 Detailed protein expression profiles of AMPK subunit isoforms in BAT in comparison to other  
620 tissues have not been performed, and to our knowledge presence of  $\gamma 3$  protein in BAT has not  
621 been demonstrated. RNA sequencing results identified  $\gamma 3$  at intermediate amounts (Reads Per  
622 Kilobase of transcript per Million mapped reads (RPKM), >40) in mouse brown preadipocytes [37].  
623 Strikingly, RNAi-mediated knockdown of either  $\gamma 1$  or  $\gamma 3$  (but not  $\gamma 2$ ) in brown adipocyte precursors  
624 was sufficient to profoundly reduce (>80%) UCP1 protein expression. Using  $\gamma 3$ -specific antibodies  
625 we developed, we have demonstrated that  $\gamma 3$  protein/activity is present and in complex mainly with  
626  $\alpha 2$  and  $\beta 2$  in mouse BAT. Even though we showed that  $\gamma 3$  is dispensable for  $\beta$ -adrenergic-induced



627 thermogenesis and remodeling of BAT and iWAT, future studies are warranted to determine if the  
628 specific activation of the  $\gamma$ 3-containing complexes (when such drugs are available) induces adipose  
629 browning and subsequent amelioration of insulin resistance and fatty liver disease.

630

## 631 **5. CONCLUSIONS**

632 We demonstrated that a genetic loss of  $\gamma$ 3 resulted in a selective loss of AICAR-stimulated  
633 glucose-lowering *in vivo* and glucose uptake specifically in glycolytic skeletal muscles *ex vivo*. We  
634 also showed that  $\gamma$ 3 is dispensable for thermogenesis and the browning of WAT. The potent pan-  
635 AMPK activators targeting the ADaM site are effective in reversing hyperglycemia in rodents and  
636 non-human primates, and this is due to activation of AMPK in skeletal muscle, not liver [23; 24].  
637 This might make them valuable adjuncts to metformin, which acts primarily on the liver [13; 58; 59].  
638 However, there are remaining important safety issues that need to be carefully considered and  
639 examined, such as the potential for AMPK activation to promote cardiac hypertrophy or the survival  
640 of cancer cells (e.g. under hypoxic conditions). To avoid these potential liabilities, the development  
641 of AMPK activators that can be targeted to specific tissues (for example, liver, muscle and  
642 adipose) by taking advantage of isoform-specific selectivity may be beneficial. We and others have  
643 shown that selective targeting of specific AMPK isoforms (e.g.  $\alpha$ 1,  $\beta$ 1) by small molecules is  
644 possible [9; 60; 61]. When a  $\gamma$ 3-complex selective activator is available in the future, ascertaining  
645 whether it sufficiently promotes skeletal muscle glucose uptake without causing cardiac  
646 hypertrophy and glycogen accumulation will be of interest.

647

## 648 **AUTHOR CONTRIBUTIONS**

649 Conceptualization: K.S. Experimental design: P.Rh., E.M.D., P.R., D.A., N.B., J.S., M.D.S., A.J.O.,  
650 M.F.K., G.R.S., K.S. Experimental execution: P.Rh., E.M.D., P.R., D.A., N.B., J.S., M.D.S., A.J.O.,  
651 J.M.Y., A.M.E., J.L.S.G., Q.O., M.F.K., M.M. Supervision: J.S., N.J., J.S.O., J.T.T., P.M., J.W.S.,  
652 M.J.S, P.D., S.C., G.R.S., K.S. Writing- Original draft preparation: K.S., P.Rh. Writing- Reviewing  
653 and Editing: All authors.

654

## 655 **GRANTS**

656 The work is supported by the Novo Nordisk Foundation (NNF20OC0063515) to K.S.  
657 E.M.D. is a Vanier Canada Graduate Scholar. GRS is supported by a Diabetes Canada  
658 Investigator Award (DI-5-17-5302-GS), a Canadian Institutes of Health Research  
659 Foundation Grant (201709FDN-CEBA-116200), a Tier 1 Canada Research Chair and a  
660 J. Bruce Duncan Endowed Chair in Metabolic Diseases. The P.M. lab is funded by the  
661 Association Française contre les Myopathies (AFM n°21711), and by the Agence



662 Nationale pour la Recherche (Myolinc, ANR R17062KK). J. W.S. and J.S.O. were  
663 supported by National Health and Medical Research Council (NHMRC) project grants  
664 (GNT1138102 and GNT1145265, respectively). This project was supported in part by  
665 the Victorian Government's Operational Infrastructure Support Program. A.J.O. is  
666 supported by a PhD scholarship funded by the Australian Catholic University. M.F.K.  
667 has received funding from Danish Diabetes Academy and Novo Nordisk Foundation.  
668 Novo Nordisk Foundation Center for Basic Metabolic Research is an independent  
669 Research Center based at the University of Copenhagen, Denmark, and partially  
670 funded by an unconditional donation from the Novo Nordisk Foundation (Grant number  
671 NNF18CC0034900).

672

### 673 **ACKNOWLEDGMENTS**

674 We thank Carles Canto, Magali Joffraud, Guillaume Jacot, Maria Deak, Caterina Collodet, Alix  
675 Zollinger, Sylviane Metairon, and Stefan Christen (all affiliated with Nestlé Research) for their  
676 technical assistance and input for experimental design, assays, and data analysis/interpretation.  
677 We also thank Juleen Zierath for her critical review of the manuscript.

678

### 679 **CONFLICT OF INTEREST**

680 P.Rh., P.D., J.S., M.J.S., J.L.S.G., M.M. are current and N.B. and K.S. were former employees of  
681 the Nestlé Research (Switzerland).

682

683 **REFERENCES**

- 684 [1] Hardie, D.G., 2011. AMP-activated protein kinase: an energy sensor that regulates all  
685 aspects of cell function. *Genes Dev* 25(18):1895-1908.
- 686 [2] Herzig, S., Shaw, R.J., 2018. AMPK: guardian of metabolism and mitochondrial homeostasis.  
687 *Nat Rev Mol Cell Biol* 19(2):121-135.
- 688 [3] Hawley, S.A., Davison, M., Woods, A., Davies, S.P., Beri, R.K., Carling, D., et al., 1996.  
689 Characterization of the AMP-activated protein kinase kinase from rat liver and identification of  
690 threonine 172 as the major site at which it phosphorylates AMP-activated protein kinase. *J Biol*  
691 *Chem* 271(44):27879-27887.
- 692 [4] Sakamoto, K., McCarthy, A., Smith, D., Green, K.A., Grahame Hardie, D., Ashworth, A., et  
693 al., 2005. Deficiency of LKB1 in skeletal muscle prevents AMPK activation and glucose uptake  
694 during contraction. *EMBO J* 24(10):1810-1820.
- 695 [5] Shaw, R.J., Lamia, K.A., Vasquez, D., Koo, S.H., Bardeesy, N., Depinho, R.A., et al., 2005. The  
696 kinase LKB1 mediates glucose homeostasis in liver and therapeutic effects of metformin. *Science*  
697 310(5754):1642-1646.
- 698 [6] Gowans, G.J., Hawley, S.A., Ross, F.A., Hardie, D.G., 2013. AMP is a true physiological  
699 regulator of AMP-activated protein kinase by both allosteric activation and enhancing net  
700 phosphorylation. *Cell Metab* 18(4):556-566.
- 701 [7] Xiao, B., Sanders, M.J., Underwood, E., Heath, R., Mayer, F.V., Carmena, D., et al., 2011.  
702 Structure of mammalian AMPK and its regulation by ADP. *Nature* 472(7342):230-233.
- 703 [8] Oakhill, J.S., Steel, R., Chen, Z.P., Scott, J.W., Ling, N., Tam, S., et al., 2011. AMPK is a direct  
704 adenylate charge-regulated protein kinase. *Science* 332(6036):1433-1435.
- 705 [9] Steinberg, G.R., Carling, D., 2019. AMP-activated protein kinase: the current landscape for  
706 drug development. *Nat Rev Drug Discov* 18(7):527-551.
- 707 [10] Buhl, E.S., Jessen, N., Pold, R., Ledet, T., Flyvbjerg, A., Pedersen, S.B., et al., 2002. Long-  
708 term AICAR administration reduces metabolic disturbances and lowers blood pressure in rats  
709 displaying features of the insulin resistance syndrome. *Diabetes* 51(7):2199-2206.
- 710 [11] Guigas, B., Sakamoto, K., Taleux, N., Reyna, S.M., Musi, N., Viollet, B., et al., 2009. Beyond  
711 AICA riboside: in search of new specific AMP-activated protein kinase activators. *IUBMB Life*  
712 61(1):18-26.
- 713 [12] Foretz, M., Hebrard, S., Leclerc, J., Zarrinpashneh, E., Soty, M., Mithieux, G., et al., 2010.  
714 Metformin inhibits hepatic gluconeogenesis in mice independently of the LKB1/AMPK pathway via  
715 a decrease in hepatic energy state. *J Clin Invest* 120(7):2355-2369.
- 716 [13] Hunter, R.W., Hughey, C.C., Lantier, L., Sundelin, E.I., Peggie, M., Zeqiraj, E., et al., 2018.  
717 Metformin reduces liver glucose production by inhibition of fructose-1-6-bisphosphatase. *Nat Med*  
718 24(9):1395-1406.
- 719 [14] Collodet, C., Foretz, M., Deak, M., Bultot, L., Metairon, S., Viollet, B., et al., 2019. AMPK  
720 promotes induction of the tumor suppressor FLCN through activation of TFEB independently of  
721 mTOR. *FASEB J* 33(11):12374-12391.
- 722 [15] Cool, B., Zinker, B., Chiou, W., Kifle, L., Cao, N., Perham, M., et al., 2006. Identification and  
723 characterization of a small molecule AMPK activator that treats key components of type 2  
724 diabetes and the metabolic syndrome. *Cell Metab* 3(6):403-416.
- 725 [16] Goransson, O., McBride, A., Hawley, S.A., Ross, F.A., Shpiro, N., Foretz, M., et al., 2007.  
726 Mechanism of action of A-769662, a valuable tool for activation of AMP-activated protein kinase. *J*  
727 *Biol Chem* 282(45):32549-32560.

- 728 [17] Scott, J.W., van Denderen, B.J., Jorgensen, S.B., Honeyman, J.E., Steinberg, G.R., Oakhill,  
729 J.S., et al., 2008. Thienopyridone drugs are selective activators of AMP-activated protein kinase  
730 beta1-containing complexes. *Chem Biol* 15(11):1220-1230.
- 731 [18] Sanders, M.J., Ali, Z.S., Hegarty, B.D., Heath, R., Snowden, M.A., Carling, D., 2007. Defining  
732 the mechanism of activation of AMP-activated protein kinase by the small molecule A-769662, a  
733 member of the thienopyridone family. *J Biol Chem* 282(45):32539-32548.
- 734 [19] Xiao, B., Sanders, M.J., Carmena, D., Bright, N.J., Haire, L.F., Underwood, E., et al., 2013.  
735 Structural basis of AMPK regulation by small molecule activators. *Nat Commun* 4:3017.
- 736 [20] Calabrese, M.F., Rajamohan, F., Harris, M.S., Caspers, N.L., Magyar, R., Withka, J.M., et al.,  
737 2014. Structural basis for AMPK activation: natural and synthetic ligands regulate kinase activity  
738 from opposite poles by different molecular mechanisms. *Structure* 22(8):1161-1172.
- 739 [21] Treebak, J.T., Birk, J.B., Hansen, B.F., Olsen, G.S., Wojtaszewski, J.F., 2009. A-769662  
740 activates AMPK beta1-containing complexes but induces glucose uptake through a PI3-kinase-  
741 dependent pathway in mouse skeletal muscle. *Am J Physiol Cell Physiol* 297(4):C1041-1052.
- 742 [22] Bultot, L., Jensen, T.E., Lai, Y.C., Madsen, A.L., Collodet, C., Kviklyte, S., et al., 2016.  
743 Benzimidazole derivative small-molecule 991 enhances AMPK activity and glucose uptake induced  
744 by AICAR or contraction in skeletal muscle. *Am J Physiol Endocrinol Metab* 311(4):E706-E719.
- 745 [23] Cokorinos, E.C., Delmore, J., Reyes, A.R., Albuquerque, B., Kjobsted, R., Jorgensen, N.O., et  
746 al., 2017. Activation of Skeletal Muscle AMPK Promotes Glucose Disposal and Glucose Lowering in  
747 Non-human Primates and Mice. *Cell Metab* 25(5):1147-1159 e1110.
- 748 [24] Myers, R.W., Guan, H.P., Ehrhart, J., Petrov, A., Prahalada, S., Tozzo, E., et al., 2017.  
749 Systemic pan-AMPK activator MK-8722 improves glucose homeostasis but induces cardiac  
750 hypertrophy. *Science* 357(6350):507-511.
- 751 [25] Barnes, B.R., Marklund, S., Steiler, T.L., Walter, M., Hjalms, G., Amarger, V., et al., 2004. The  
752 5'-AMP-activated protein kinase gamma3 isoform has a key role in carbohydrate and lipid  
753 metabolism in glycolytic skeletal muscle. *J Biol Chem* 279(37):38441-38447.
- 754 [26] Mahlapuu, M., Johansson, C., Lindgren, K., Hjalms, G., Barnes, B.R., Krook, A., et al., 2004.  
755 Expression profiling of the gamma-subunit isoforms of AMP-activated protein kinase suggests a  
756 major role for gamma3 in white skeletal muscle. *Am J Physiol Endocrinol Metab* 286(2):E194-200.
- 757 [27] Yu, H., Fujii, N., Hirshman, M.F., Pomerleau, J.M., Goodyear, L.J., 2004. Cloning and  
758 characterization of mouse 5'-AMP-activated protein kinase gamma3 subunit. *Am J Physiol Cell*  
759 *Physiol* 286(2):C283-292.
- 760 [28] Mu, J., Brozinick, J.T., Jr., Valladares, O., Bucan, M., Birnbaum, M.J., 2001. A role for AMP-  
761 activated protein kinase in contraction- and hypoxia-regulated glucose transport in skeletal  
762 muscle. *Mol Cell* 7(5):1085-1094.
- 763 [29] Fujii, N., Hirshman, M.F., Kane, E.M., Ho, R.C., Peter, L.E., Seifert, M.M., et al., 2005. AMP-  
764 activated protein kinase alpha2 activity is not essential for contraction- and hyperosmolarity-  
765 induced glucose transport in skeletal muscle. *J Biol Chem* 280(47):39033-39041.
- 766 [30] Jorgensen, S.B., Viollet, B., Andreelli, F., Frosig, C., Birk, J.B., Schjerling, P., et al., 2004.  
767 Knockout of the alpha2 but not alpha1 5'-AMP-activated protein kinase isoform abolishes 5-  
768 aminoimidazole-4-carboxamide-1-beta-4-ribofuranosidebut not contraction-induced glucose  
769 uptake in skeletal muscle. *J Biol Chem* 279(2):1070-1079.
- 770 [31] Steinberg, G.R., O'Neill, H.M., Dzamko, N.L., Galic, S., Naim, T., Koopman, R., et al., 2010.  
771 Whole body deletion of AMP-activated protein kinase {beta}2 reduces muscle AMPK activity and  
772 exercise capacity. *J Biol Chem* 285(48):37198-37209.

- 773 [32] Dasgupta, B., Ju, J.S., Sasaki, Y., Liu, X., Jung, S.R., Higashida, K., et al., 2012. The AMPK  
774 beta2 subunit is required for energy homeostasis during metabolic stress. *Mol Cell Biol*  
775 32(14):2837-2848.
- 776 [33] Hardie, D.G., Sakamoto, K., 2006. AMPK: a key sensor of fuel and energy status in skeletal  
777 muscle. *Physiology (Bethesda)* 21:48-60.
- 778 [34] Kjobsted, R., Hingst, J.R., Fentz, J., Foretz, M., Sanz, M.N., Pehmoller, C., et al., 2018. AMPK  
779 in skeletal muscle function and metabolism. *FASEB J* 32(4):1741-1777.
- 780 [35] Desjardins, E.M., Steinberg, G.R., 2018. Emerging Role of AMPK in Brown and Beige  
781 Adipose Tissue (BAT): Implications for Obesity, Insulin Resistance, and Type 2 Diabetes. *Curr Diab*  
782 *Rep* 18(10):80.
- 783 [36] Mottillo, E.P., Desjardins, E.M., Crane, J.D., Smith, B.K., Green, A.E., Ducommun, S., et al.,  
784 2016. Lack of Adipocyte AMPK Exacerbates Insulin Resistance and Hepatic Steatosis through  
785 Brown and Beige Adipose Tissue Function. *Cell Metab* 24(1):118-129.
- 786 [37] Perdikari, A., Kulenkampff, E., Rudigier, C., Neubauer, H., Luippold, G., Redemann, N., et al.,  
787 2017. A high-throughput, image-based screen to identify kinases involved in brown adipocyte  
788 development. *Sci Signal* 10(466).
- 789 [38] Nakada, D., Saunders, T.L., Morrison, S.J., 2010. Lkb1 regulates cell cycle and energy  
790 metabolism in haematopoietic stem cells. *Nature* 468(7324):653-658.
- 791 [39] Chen, Q., Xie, B., Zhu, S., Rong, P., Sheng, Y., Ducommun, S., et al., 2017. A Tbc1d1  
792 (Ser231Ala)-knockin mutation partially impairs AICAR- but not exercise-induced muscle glucose  
793 uptake in mice. *Diabetologia* 60(2):336-345.
- 794 [40] Dos Santos, M., Backer, S., Saintpierre, B., Izac, B., Andrieu, M., Letourneur, F., et al., 2020.  
795 Single-nucleus RNA-seq and FISH identify coordinated transcriptional activity in mammalian  
796 myofibers. *Nat Commun* 11(1):5102.
- 797 [41] Shi, H., Munk, A., Nielsen, T.S., Daughtry, M.R., Larsson, L., Li, S., et al., 2018. Skeletal  
798 muscle O-GlcNAc transferase is important for muscle energy homeostasis and whole-body insulin  
799 sensitivity. *Mol Metab* 11:160-177.
- 800 [42] Dite, T.A., Langendorf, C.G., Hoque, A., Galic, S., Rebello, R.J., Ovens, A.J., et al., 2018. AMP-  
801 activated protein kinase selectively inhibited by the type II inhibitor SBI-0206965. *J Biol Chem*  
802 293(23):8874-8885.
- 803 [43] Scott, J.W., Galic, S., Graham, K.L., Foitzik, R., Ling, N.X., Dite, T.A., et al., 2015. Inhibition of  
804 AMP-Activated Protein Kinase at the Allosteric Drug-Binding Site Promotes Islet Insulin Release.  
805 *Chem Biol* 22(6):705-711.
- 806 [44] Crane, J.D., Mottillo, E.P., Farncombe, T.H., Morrison, K.M., Steinberg, G.R., 2014. A  
807 standardized infrared imaging technique that specifically detects UCP1-mediated thermogenesis in  
808 vivo. *Mol Metab* 3(4):490-494.
- 809 [45] O'Neill, H.M., Maarbjerg, S.J., Crane, J.D., Jeppesen, J., Jorgensen, S.B., Schertzer, J.D., et  
810 al., 2011. AMP-activated protein kinase (AMPK) beta1beta2 muscle null mice reveal an essential  
811 role for AMPK in maintaining mitochondrial content and glucose uptake during exercise. *Proc Natl*  
812 *Acad Sci U S A* 108(38):16092-16097.
- 813 [46] Fentz, J., Kjobsted, R., Birk, J.B., Jordy, A.B., Jeppesen, J., Thorsen, K., et al., 2015.  
814 AMPKalpha is critical for enhancing skeletal muscle fatty acid utilization during in vivo exercise in  
815 mice. *FASEB J* 29(5):1725-1738.

- 816 [47] Lantier, L., Fentz, J., Mounier, R., Leclerc, J., Treebak, J.T., Pehmoller, C., et al., 2014. AMPK  
817 controls exercise endurance, mitochondrial oxidative capacity, and skeletal muscle integrity.  
818 *FASEB J* 28(7):3211-3224.
- 819 [48] Zong, H., Ren, J.M., Young, L.H., Pypaert, M., Mu, J., Birnbaum, M.J., et al., 2002. AMP  
820 kinase is required for mitochondrial biogenesis in skeletal muscle in response to chronic energy  
821 deprivation. *Proc Natl Acad Sci U S A* 99(25):15983-15987.
- 822 [49] Garcia-Roves, P.M., Osler, M.E., Holmstrom, M.H., Zierath, J.R., 2008. Gain-of-function  
823 R225Q mutation in AMP-activated protein kinase gamma3 subunit increases mitochondrial  
824 biogenesis in glycolytic skeletal muscle. *J Biol Chem* 283(51):35724-35734.
- 825 [50] Lai, Y.C., Kviklyte, S., Vertommen, D., Lantier, L., Foretz, M., Viollet, B., et al., 2014. A small-  
826 molecule benzimidazole derivative that potently activates AMPK to increase glucose transport in  
827 skeletal muscle: comparison with effects of contraction and other AMPK activators. *Biochem J*  
828 460(3):363-375.
- 829 [51] Foretz, M., Hebrard, S., Guihard, S., Leclerc, J., Do Cruzeiro, M., Hamard, G., et al., 2011.  
830 The AMPKgamma1 subunit plays an essential role in erythrocyte membrane elasticity, and its  
831 genetic inactivation induces splenomegaly and anemia. *FASEB J* 25(1):337-347.
- 832 [52] Treebak, J.T., Birk, J.B., Rose, A.J., Kiens, B., Richter, E.A., Wojtaszewski, J.F., 2007. AS160  
833 phosphorylation is associated with activation of alpha2beta2gamma1- but not  
834 alpha2beta2gamma3-AMPK trimeric complex in skeletal muscle during exercise in humans. *Am J*  
835 *Physiol Endocrinol Metab* 292(3):E715-722.
- 836 [53] Rajamohan, F., Reyes, A.R., Frisbie, R.K., Hoth, L.R., Sahasrabudhe, P., Magyar, R., et al.,  
837 2016. Probing the enzyme kinetics, allosteric modulation and activation of alpha1- and alpha2-  
838 subunit-containing AMP-activated protein kinase (AMPK) heterotrimeric complexes by  
839 pharmacological and physiological activators. *Biochem J* 473(5):581-592.
- 840 [54] Ross, F.A., Jensen, T.E., Hardie, D.G., 2016. Differential regulation by AMP and ADP of  
841 AMPK complexes containing different gamma subunit isoforms. *Biochem J* 473(2):189-199.
- 842 [55] Willows, R., Navaratnam, N., Lima, A., Read, J., Carling, D., 2017. Effect of different gamma-  
843 subunit isoforms on the regulation of AMPK. *Biochem J* 474(10):1741-1754.
- 844 [56] Vincent, M.F., Erion, M.D., Gruber, H.E., Van den Berghe, G., 1996. Hypoglycaemic effect of  
845 AICArboside in mice. *Diabetologia* 39(10):1148-1155.
- 846 [57] Wu, L., Zhang, L., Li, B., Jiang, H., Duan, Y., Xie, Z., et al., 2018. AMP-Activated Protein  
847 Kinase (AMPK) Regulates Energy Metabolism through Modulating Thermogenesis in Adipose  
848 Tissue. *Front Physiol* 9:122.
- 849 [58] Fullerton, M.D., Galic, S., Marcinko, K., Sikkema, S., Pulinilkunnil, T., Chen, Z.P., et al., 2013.  
850 Single phosphorylation sites in Acc1 and Acc2 regulate lipid homeostasis and the insulin-sensitizing  
851 effects of metformin. *Nat Med* 19(12):1649-1654.
- 852 [59] Rena, G., Pearson, E.R., Sakamoto, K., 2013. Molecular mechanism of action of metformin:  
853 old or new insights? *Diabetologia* 56(9):1898-1906.
- 854 [60] Hunter, R.W., Foretz, M., Bultot, L., Fullerton, M.D., Deak, M., Ross, F.A., et al., 2014.  
855 Mechanism of action of compound-13: an alpha1-selective small molecule activator of AMPK.  
856 *Chem Biol* 21(7):866-879.
- 857 [61] Langendorf, C.G., Ngoei, K.R.W., Scott, J.W., Ling, N.X.Y., Issa, S.M.A., Gorman, M.A., et al.,  
858 2016. Structural basis of allosteric and synergistic activation of AMPK by furan-2-phosphonic  
859 derivative C2 binding. *Nat Commun* 7:10912.

861



862 **FIGURE LEGENDS**

863 **Figure 1: Genetic ablation of the AMPK $\gamma$ 3 causes a significant loss of  $\alpha$ 2 and  $\beta$ 2 expression**  
864 **in mouse glycolytic skeletal muscles**

865 (A) Immunoblot (IB) analysis of  $\gamma$ 3 expression in a panel of tissues extracted from wild-type (WT)  
866 or AMPK $\gamma$ 3-null ( $\gamma$ 3<sup>-/-</sup>) mice (upper panel).  $\gamma$ 3 expression was further analyzed by immunoblotting  
867 following enrichment of the  $\gamma$ 3 proteins via immunoprecipitation (IP) from the indicated tissue  
868 extracts (200  $\mu$ g) (middle panel). Liver and skeletal muscle (GAS) tissue extracts from the  
869 indicated genotypes were used for immunoprecipitation with either  $\gamma$ 3-specific antibody or species-  
870 matched IgG (as negative control) and the immune-complexes were subsequently immunoblotted  
871 with  $\gamma$ 3 antibody (lower panel). (B) The  $\gamma$ 3-containing AMPK complexes were immunoprecipitated  
872 from the indicated tissues harvested from the indicated genotypes and an *in vitro* AMPK activity  
873 assay was performed in duplicate (n=3 per tissue/genotype). (C, D) The *In vitro* AMPK activity  
874 assay was performed on  $\alpha$ 1- or  $\alpha$ 2-containing AMPK complexes immunoprecipitated from GAS  
875 extracts (n=9-10 per tissue/genotype). (E-G) Representative immunoblot images and quantification  
876 of the AMPK isoform-specific expression using an automated capillary immunoblotting system  
877 (Sally Sue) with the indicated antibodies as described in Materials and Methods. AMPK isoform  
878 expressions were normalized by their respective vinculin expression (loading control) and are  
879 shown as fold change relative to WT. Note that AMPK $\gamma$ 1 expression was quantified using another  
880 immunoblotting system (Li-COR, described in the Materials and Methods) due to antibody  
881 compatibility (n=5-11 per tissue/genotype). (H, I) Relative levels of mRNA of the indicated genes  
882 (encoding AMPK isoforms) in the indicated skeletal muscles were assessed by qPCR (n=5 per  
883 tissue/genotype). Results are shown as means  $\pm$  SEM. Statistical significance was determined  
884 using the unpaired, two-tailed Student's t-test and are shown as #*P* < 0.05 (WT vs.  $\gamma$ 3<sup>-/-</sup>). GAS;  
885 gastrocnemius, EDL; extensor digitorum longus, SOL; soleus, IgG; immunoglobulin G.

886

887 **Figure 2: AMPK $\gamma$ 3 deficiency does not affect mitochondrial content and components, or**  
888 **fiber-type composition in skeletal muscles**

889 (A, B) Relative quantification of mitochondrial DNA (mtDNA) was performed using qPCR-based  
890 assay as described in the Materials and Methods (n=5 per tissue/genotype). (C, D) Citrate  
891 synthase activity was measured in the indicated muscle extracts (n=8 per tissue/genotype). (E, F)  
892 Immunoblot analysis and quantification of mitochondrial complexes in the indicated muscles (n=7  
893 per tissue/genotype). (G-I) Representative cross-sectional images (of n=4 per genotype) of the  
894 whole-hindlimb muscle fiber-type analysis of the indicated genotypes using isoform-specific myosin  
895 heavy chain (MyHC) and laminin antibodies followed by immunofluorescent signal detection (G).  
896 Scale bar=1 mm. Quantification of relative isoform-specific myosin heavy chain (MyHC)



897 composition/fraction (red: MyHC I, green: MyHC IIa, blue: MyHC IIb, laminin: gray/white) and fiber  
898 area in the indicated muscles were performed as described in Materials and Methods. Unstained  
899 fibers are not included in the fiber fraction analysis (H, L, n=3-4 per tissue/genotype). Results are  
900 shown as means  $\pm$  SEM. GAS; gastrocnemius, EDL; extensor digitorum longus; SOL; soleus, Tib;  
901 tibialis anterior, Plant; plantaris, F; fibula, T; tibia.

902

903 **Figure 3: AMPK $\gamma$ 3 is dispensable for maintaining glucose homeostasis under chow and**  
904 **high fat diet (HFD) feeding**

905 (A) Time sequence of the diet intervention, analysis of body composition (qNMR), oral glucose  
906 tolerance test (GTT) and plasma hormone analysis (blood chemistry). Mice were fed chow diet  
907 after weaning until 11 weeks of age before switching to HFD (60% kcal% fat). Body weight over  
908 time of the indicated genotypes (n=10 per genotype). (B) Body composition determined by qNMR  
909 in the indicated genotypes during the indicated diet treatment. (C, D) Plasma insulin and leptin  
910 levels were determined using the commercial enzyme-linked immunosorbent assay kits. (E) Mice  
911 were fasted overnight and an oral GTT test was performed during chow (week 10) and HFD (week  
912 17) feeding by monitoring blood glucose kinetics over the indicated duration following an oral  
913 administration of a bolus of glucose solution (2 g/kg body weight). (F) Extensor digitorum longus  
914 (EDL) muscles from the indicated genotypes on chow diet (10-12-week old males from a separate  
915 cohort. n=5-7 per genotype) were isolated and incubated in the presence or absence of insulin (100  
916 nM) for 50 min and were subjected to glucose uptake assay and immunoblot analysis using the  
917 indicated antibodies. Results are shown as means  $\pm$  SEM. Statistical significance was determined  
918 using the unpaired/two-tailed Student's t-test or one-way analysis of variance with Bonferroni  
919 correction and are shown as \* $P < 0.05$  (treatment effect within the same genotype).

920

921 **Figure 4: AMPK $\gamma$ 3 is required for AICAR-induced glucose uptake in glycolytic skeletal**  
922 **muscles and hypoglycemia**

923 (A-F) EDL or SOL muscles were isolated from the indicated genotypes and incubated in the  
924 absence (vehicle, DMSO) or presence of AICAR (2 mM) for 50 min followed by an additional 10-  
925 min incubation with the radioactive 2-deoxy-glucose tracer. One portion of the muscle extracts was  
926 subjected to glucose uptake measurement (A, B) and the other was used for immunoblot analysis  
927 using the automated capillary immunoblotting system with the indicated antibodies (C-F) (n=4-7  
928 per treatment/genotype). (G, H) AICAR tolerance test and muscle ZMP analysis. Mice were fasted  
929 for 3 hours and injected either with vehicle (water) or AICAR (250 mg/kg body weight, i.p.) followed  
930 by blood glucose kinetics measurement over the indicated duration (G). Following the AICAR  
931 tolerance test, mice were euthanized and GAS muscles were extracted and ZMP levels were

932 determined (H) (n=5-12 per treatment/genotype). Results are shown as means  $\pm$  SEM. Statistical  
933 significance was determined using the unpaired/two-tailed Student's t-test or one-way analysis of  
934 variance with Bonferroni correction and are shown as \* $P < 0.05$  (treatment effect within the same  
935 genotype), # $P < 0.05$  (WT vs.  $\gamma 3^{-/-}$  within the same treatment). GAS; gastrocnemius, EDL; extensor  
936 digitorum longus, SOL; soleus, AICAR; 5-aminoimidazole-4-carboxamide ribonucleoside, ZMP;  
937 AICAR monophosphate

938

939 **Figure 5: AMPK $\alpha 1/\alpha 2$ , but not  $\gamma 3$ , is required for glucose uptake skeletal muscles and**  
940 **hypoglycemia in response to the ADaM site-targeted activators, 991 and MK-8722**

941 (A-D) EDL or SOL muscles were isolated from the indicated genotypes and incubated in the  
942 absence (vehicle, DMSO) or presence of 991 (10  $\mu$ M) for 50 min followed by an additional 10-min  
943 incubation with the radioactive 2-deoxy-glucose tracer. One portion of the muscle extracts was  
944 subjected to glucose uptake measurement (A, B) and the other was used for immunoblot analysis  
945 using the indicated antibodies (followed by a signal detection using enhanced chemiluminescence)  
946 (C, D, n=3-4 per treatment/genotype). (E-L) EDL or SOL muscles were isolated from the indicated  
947 genotypes and incubated in the absence (vehicle, DMSO) or presence of the indicated compounds  
948 for 50 min followed by an additional 10-min incubation with the radioactive 2-deoxy-glucose tracer.  
949 One portion of the muscle extracts was subjected to immunoprecipitation with the  $\gamma 3$  antibody  
950 followed by an *in vitro* AMPK activity assay (E, F, n=4-14). The other portion was subjected to  
951 glucose uptake measurement (G, H, n=4-9) or immunoblot analysis using the automated capillary  
952 immunoblotting system with the indicated antibodies (I-L, n=4-9). M) MK-8722 tolerance test. Mice  
953 were fasted for 3 hours and orally treated either with vehicle or MK-8722 (10 mg/kg body weight)  
954 followed by blood glucose kinetics monitoring over the indicated duration. Results are shown as  
955 means  $\pm$  SEM. Statistical significance was determined using the unpaired/two-tailed Student's t-  
956 test or one-way analysis of variance with Bonferroni correction and are shown as \* $P < 0.05$   
957 (treatment effect within the same genotype), # $P < 0.05$  (WT vs.  $\gamma 3^{-/-}$  within the same treatment).  
958 EDL; extensor digitorum longus; SOL; soleus, AICAR; 5-aminoimidazole-4-carboxamide  
959 ribonucleoside

960

961 **Figure 6: AMPK $\gamma 3$  is expressed and forms functional trimeric complexes in mouse brown**  
962 **adipose tissue (BAT)**

963 (A) Immunoblot analysis of the skeletal muscle (EDL) and BAT extracts harvested from WT mice  
964 using the automated capillary immunoblotting system with the indicated antibodies. Note that  $\gamma 1$   
965 expression was quantified using another immunoblotting system (Li-COR) due to antibody  
966 compatibility. (B) Extracts from GAS muscle (100  $\mu$ g) or BAT (1000  $\mu$ g) were subjected to

967 immunoprecipitation with  $\gamma 3$  antibody and the  $\gamma 3$ -containing immune-complexes were assayed for  
968 AMPK activity *in vitro*. (C, D)  $\gamma 3$ - or  $\gamma 1$ -containing AMPK complexes were immunoprecipitated from  
969 GAS (100  $\mu$ g) or BAT (1000  $\mu$ g) extracts and subsequently subjected to immunoblot analysis using  
970 the indicated antibodies followed by a signal detection using enhanced chemiluminescence. (E)  
971 Quantification of the isoform-specific AMPK expression of a panel of tissues (harvested from WT  
972 or  $\gamma 3^{-/-}$  mice) was performed using the automated capillary immunoblotting system with the  
973 indicated antibodies. Results are shown as means  $\pm$  SEM (n=5-7). GAS; gastrocnemius, EDL;  
974 extensor digitorum longus

975

976 **Figure 7: AMPK  $\gamma 3$  is not required for the non-shivering thermogenesis or the browning of**  
977 **inguinal white adipose tissue (WAT) in mice**

978 (A) Oxygen consumption ( $VO_2$ ), (B, C) Interscapular brown adipose tissue (BAT) surface area  
979 temperature with representative thermal images, and (D) serum non-esterified free fatty acid  
980 (NEFA) concentration in response to a single injection of saline or CL 316,243 in male WT or  $\gamma 3^{-/-}$   
981 mice (0.033 nmol/g, 20 min time-point), n=9-13 per group. Data are means  $\pm$  SEM with a CL  
982 316,243 effect shown as  $*P < 0.05$ , as determined via repeated measures two-way analysis of  
983 variance (ANOVA). (E) Oxygen consumption ( $VO_2$ ) basally and 6-h post-injection of saline or CL  
984 316,243 in male WT or  $\gamma 3^{-/-}$  mice on indicated days, n=5-8 per group. (F) Final body weight (BW),  
985 (G) BAT weight, and (H) inguinal WAT (iWAT) depot weight following 5 consecutive days of saline  
986 or CL 316,243 (5D CL) injections in male WT or  $\gamma 3^{-/-}$  mice, n=5-8 per group. (I, J) Representative  
987 histological images of H&E-stained BAT (I) and iWAT (J) (10X magnification) from male WT or  $\gamma 3^{-/-}$   
988 mice treated with saline or 5D CL. K) mRNA expression of genes indicative of iWAT browning, *MT-*  
989 *CO2* (n=4-8 per group), *Cox8b* (n=5-8 per group), and *Cidea* (n=5-7 per group) in male WT or  $\gamma 3^{-/-}$   
990 mice treated with saline or 5D CL for 5 days. L) Immunoblot analysis and densitometry  
991 quantification (M) of UCP1 in male WT and  $\gamma 3^{-/-}$  mice treated with saline or 5D CL for 5 days (n=6-  
992 8 per group). Data are means  $\pm$  SEM with  $*P < 0.05$  denoting a 5D CL effect, as determined via  
993 repeated measures two-way ANOVA (A) and regular two-way ANOVA.

994

995

996 **Supplementary Figure 1: Generation and general characterization of the AMPK $\gamma$ 3 knockout**  
997 **(KO) mice**

998 (A) A schematic illustrating the targeting strategy used to generate Prkag3 knockout (AMPK $\gamma$ 3  
999 KO) mouse model (C57BL/6 background). The targeting strategy is based on NCBI transcript  
1000 NM\_153744\_3. The constitutive KO allele is obtained after *in-vivo* Cre-mediated recombination  
1001 using Cre-Deleter mice (Taconic Biosciences) in which Cre is expressed under the control of the  
1002 Gt(ROSA)26Sor gene. Deletion of exons 5-10 should result in the loss of function of the Prkag3  
1003 gene by deleting the cystathionine  $\beta$ -synthase (CBS) 2 domain and parts of the CBS 1 and 3  
1004 domains and by generating a frame shift from exon 4 to exon 11 (premature stop codon in exon  
1005 12). In addition, the resulting transcript may be a target for Non-sense Mediated RNA Decay and  
1006 may, therefore, not be expressed at significant level. (B) Immunoblot analysis of the gastrocnemius  
1007 (GAS) muscle extracts obtained from the indicated genotypes using the anti- $\gamma$ 3 antibody raised  
1008 against residues 44–64 (within exon 1-3) of the mouse  $\gamma$ 3. (n=3 per genotype) (C-E) General  
1009 mouse phenotyping was performed by PHENOMIN (Illkirch, France). Mice were housed in  
1010 metabolic phenotyping cages (TSE system, Labmaster, Germany) and after a 3-hour  
1011 acclimatization period at ambient temperature (21°C  $\pm$  2), food intake (C), ambulatory activity (D)  
1012 and oxygen consumption (E) were monitored. (n=10 per genotype) Results are shown as  
1013 means  $\pm$  SEM.

1014

1015 **Supplementary Figure 2: AMPK isoform expression,  $\gamma$ 3 activity, AICAR-stimulated glucose**  
1016 **uptake and AMPK signaling in heterozygous  $\gamma$ 3<sup>+/-</sup> mice and muscle energy charge following**  
1017 **AICAR injection in WT and  $\gamma$ 3<sup>-/-</sup> mice**

1018 (A, B) Immunoblot analysis and quantification of the AMPK isoform expression in extensor  
1019 digitorum longus (EDL) muscles from wild-type (WT) and heterozygous  $\gamma$ 3<sup>+/-</sup> mice using the  
1020 indicated antibodies. Representative blot images shown (n=5-6 per genotype). (C, D)  $\gamma$ 3-containing  
1021 complexes were immunoprecipitated and were subjected to an *in vitro* AMPK assay. The activity  
1022 was shown as absolute unit (C) or fold increase relative to vehicle for corresponding genotype (D).  
1023 (n=5-6 per treatment/genotype) (E-G) EDL muscles were isolated from the indicated genotypes  
1024 and incubated in the absence (vehicle, DMSO) or presence of AICAR (2 mM) for 50 min followed  
1025 by an additional 10-min incubation with the radioactive 2-deoxy-glucose tracer. One portion of the  
1026 muscle extracts was subjected to glucose uptake measurement (E) and the other was used for  
1027 immunoblot analysis using the automated capillary immunoblotting system with the indicated  
1028 antibodies (F, G) (n=5-7 per treatment/genotype). H) Following the AICAR tolerance test (Fig. 4G),  
1029 mice were euthanized and GAS muscles were extracted and nucleotide levels were determined for  
1030 calculation of the energy charge. (n=5-12 per treatment/genotype. Results are shown as

1031 means  $\pm$  SEM. Statistical significance was determined using the unpaired/two-tailed Student's t-  
1032 test or one-way analysis of variance with Bonferroni correction and are shown as \* $P < 0.05$   
1033 (treatment effect within the same genotype), # $P < 0.05$  (WT vs.  $\gamma 3^{+/-}$  within the same treatment).  
1034

1035 **Supplementary Figure 3: MK-8722 tolerance test in WT and  $\gamma 3^{+/-}$  mice**

1036 Mice were fasted for 3 hours and orally treated with MK-8722 (30 mg/kg body weight) followed by  
1037 blood glucose kinetics monitoring over the indicated duration. (n=8-10 per treatment/genotype)

1038 Results are shown as means  $\pm$  SEM.

1039

1040

1041

# Figure 1

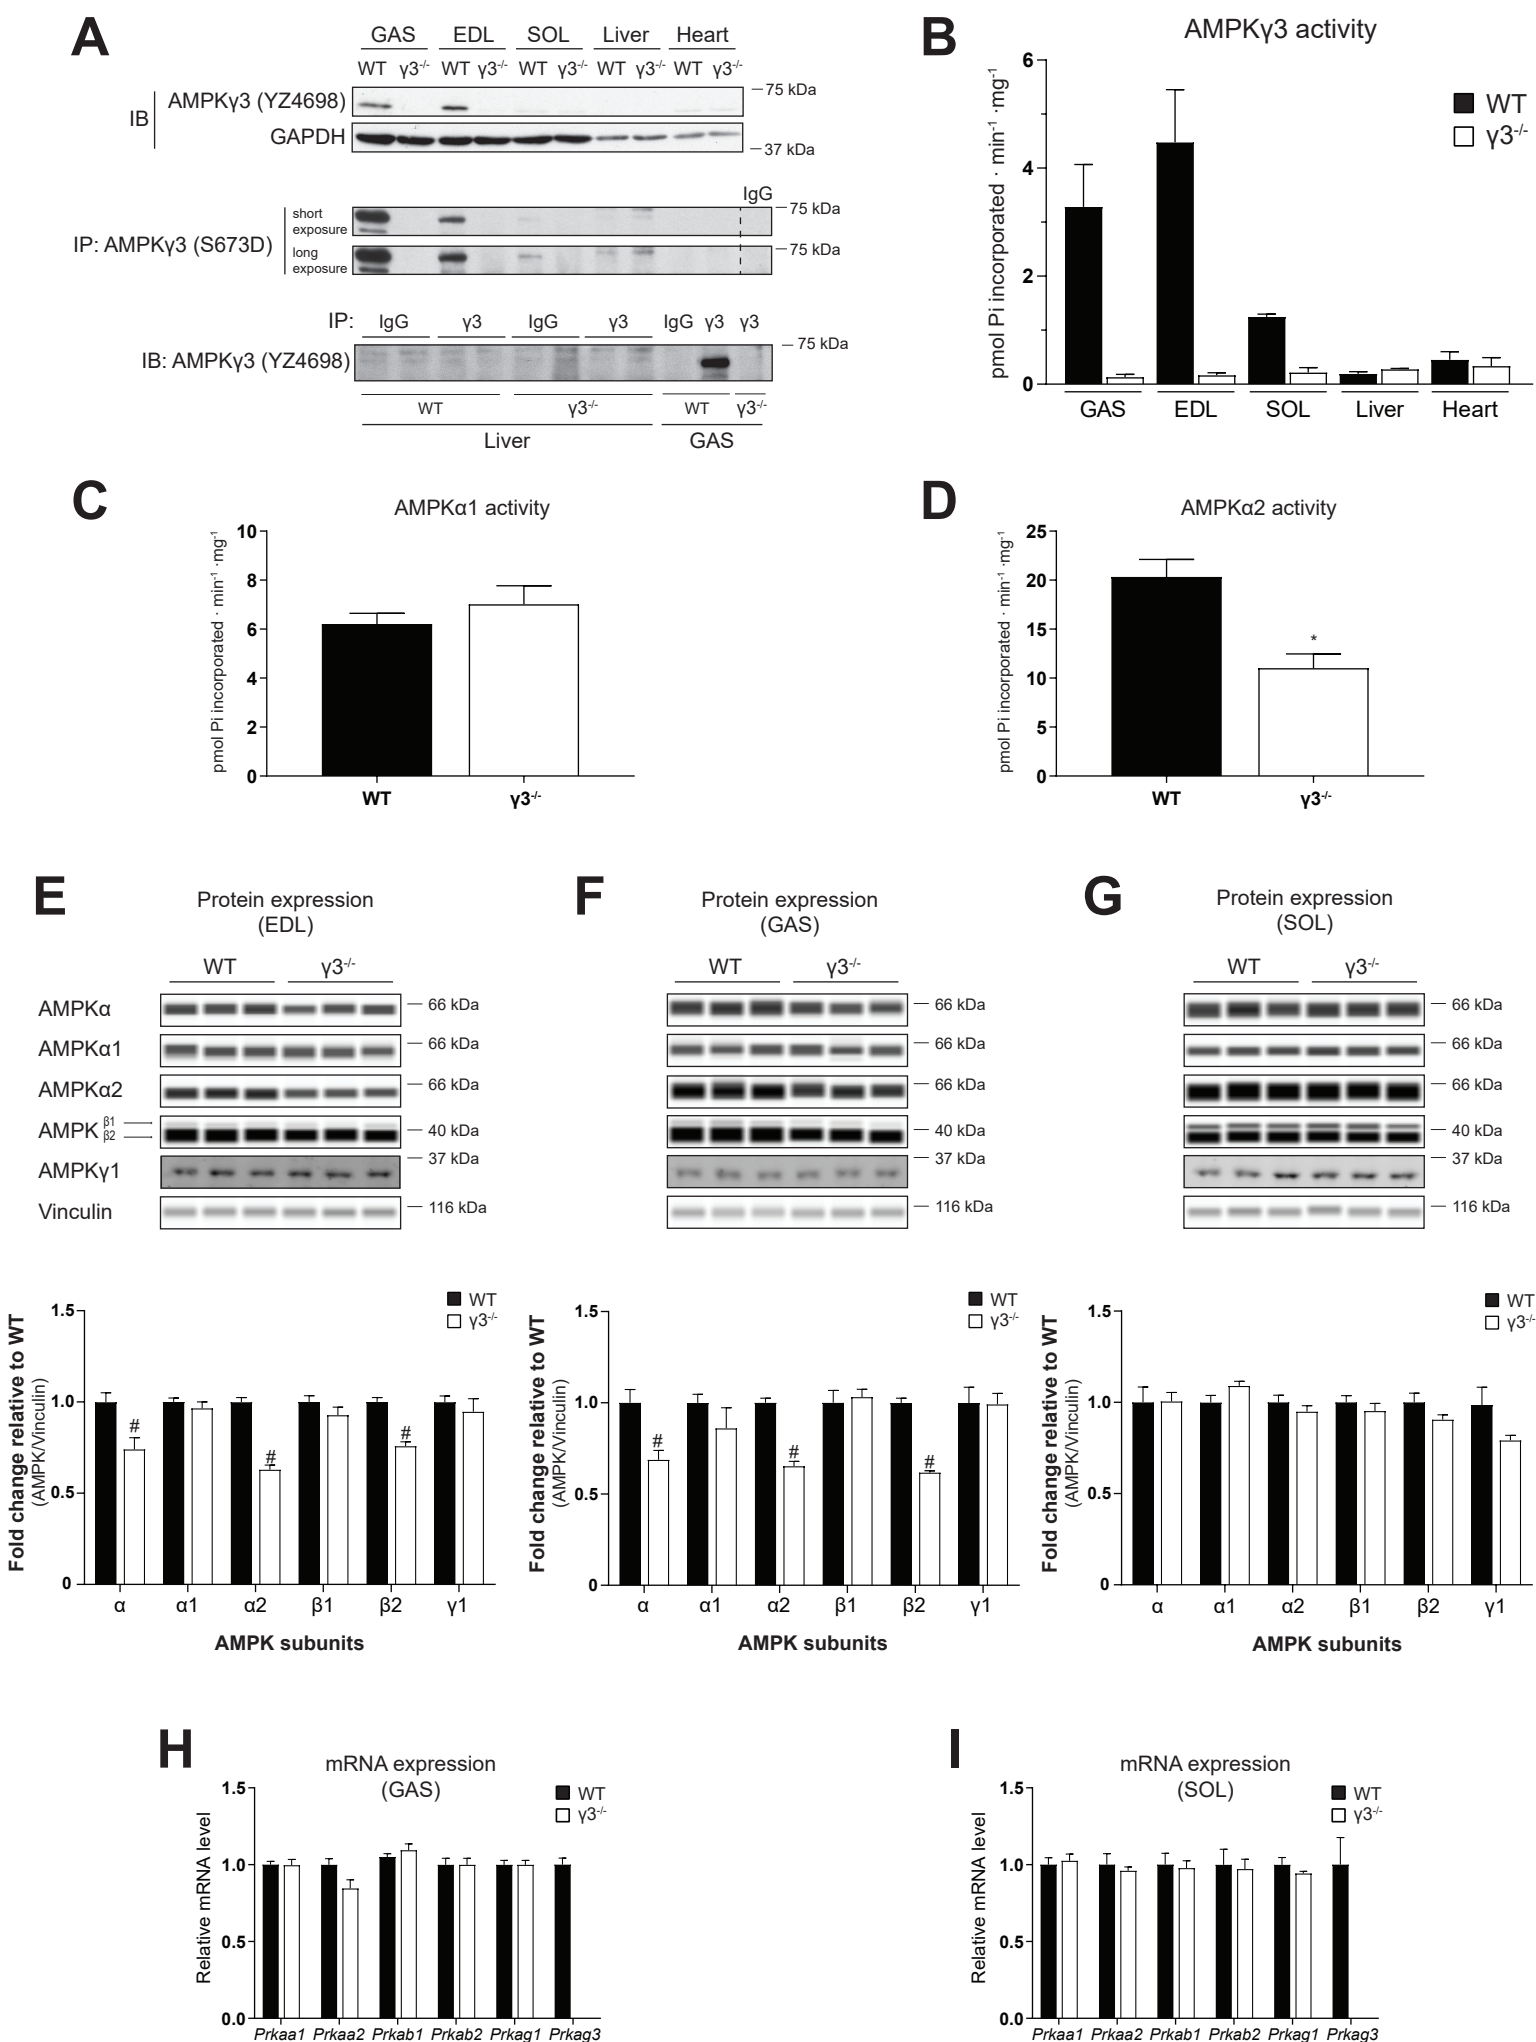



## Figure 2

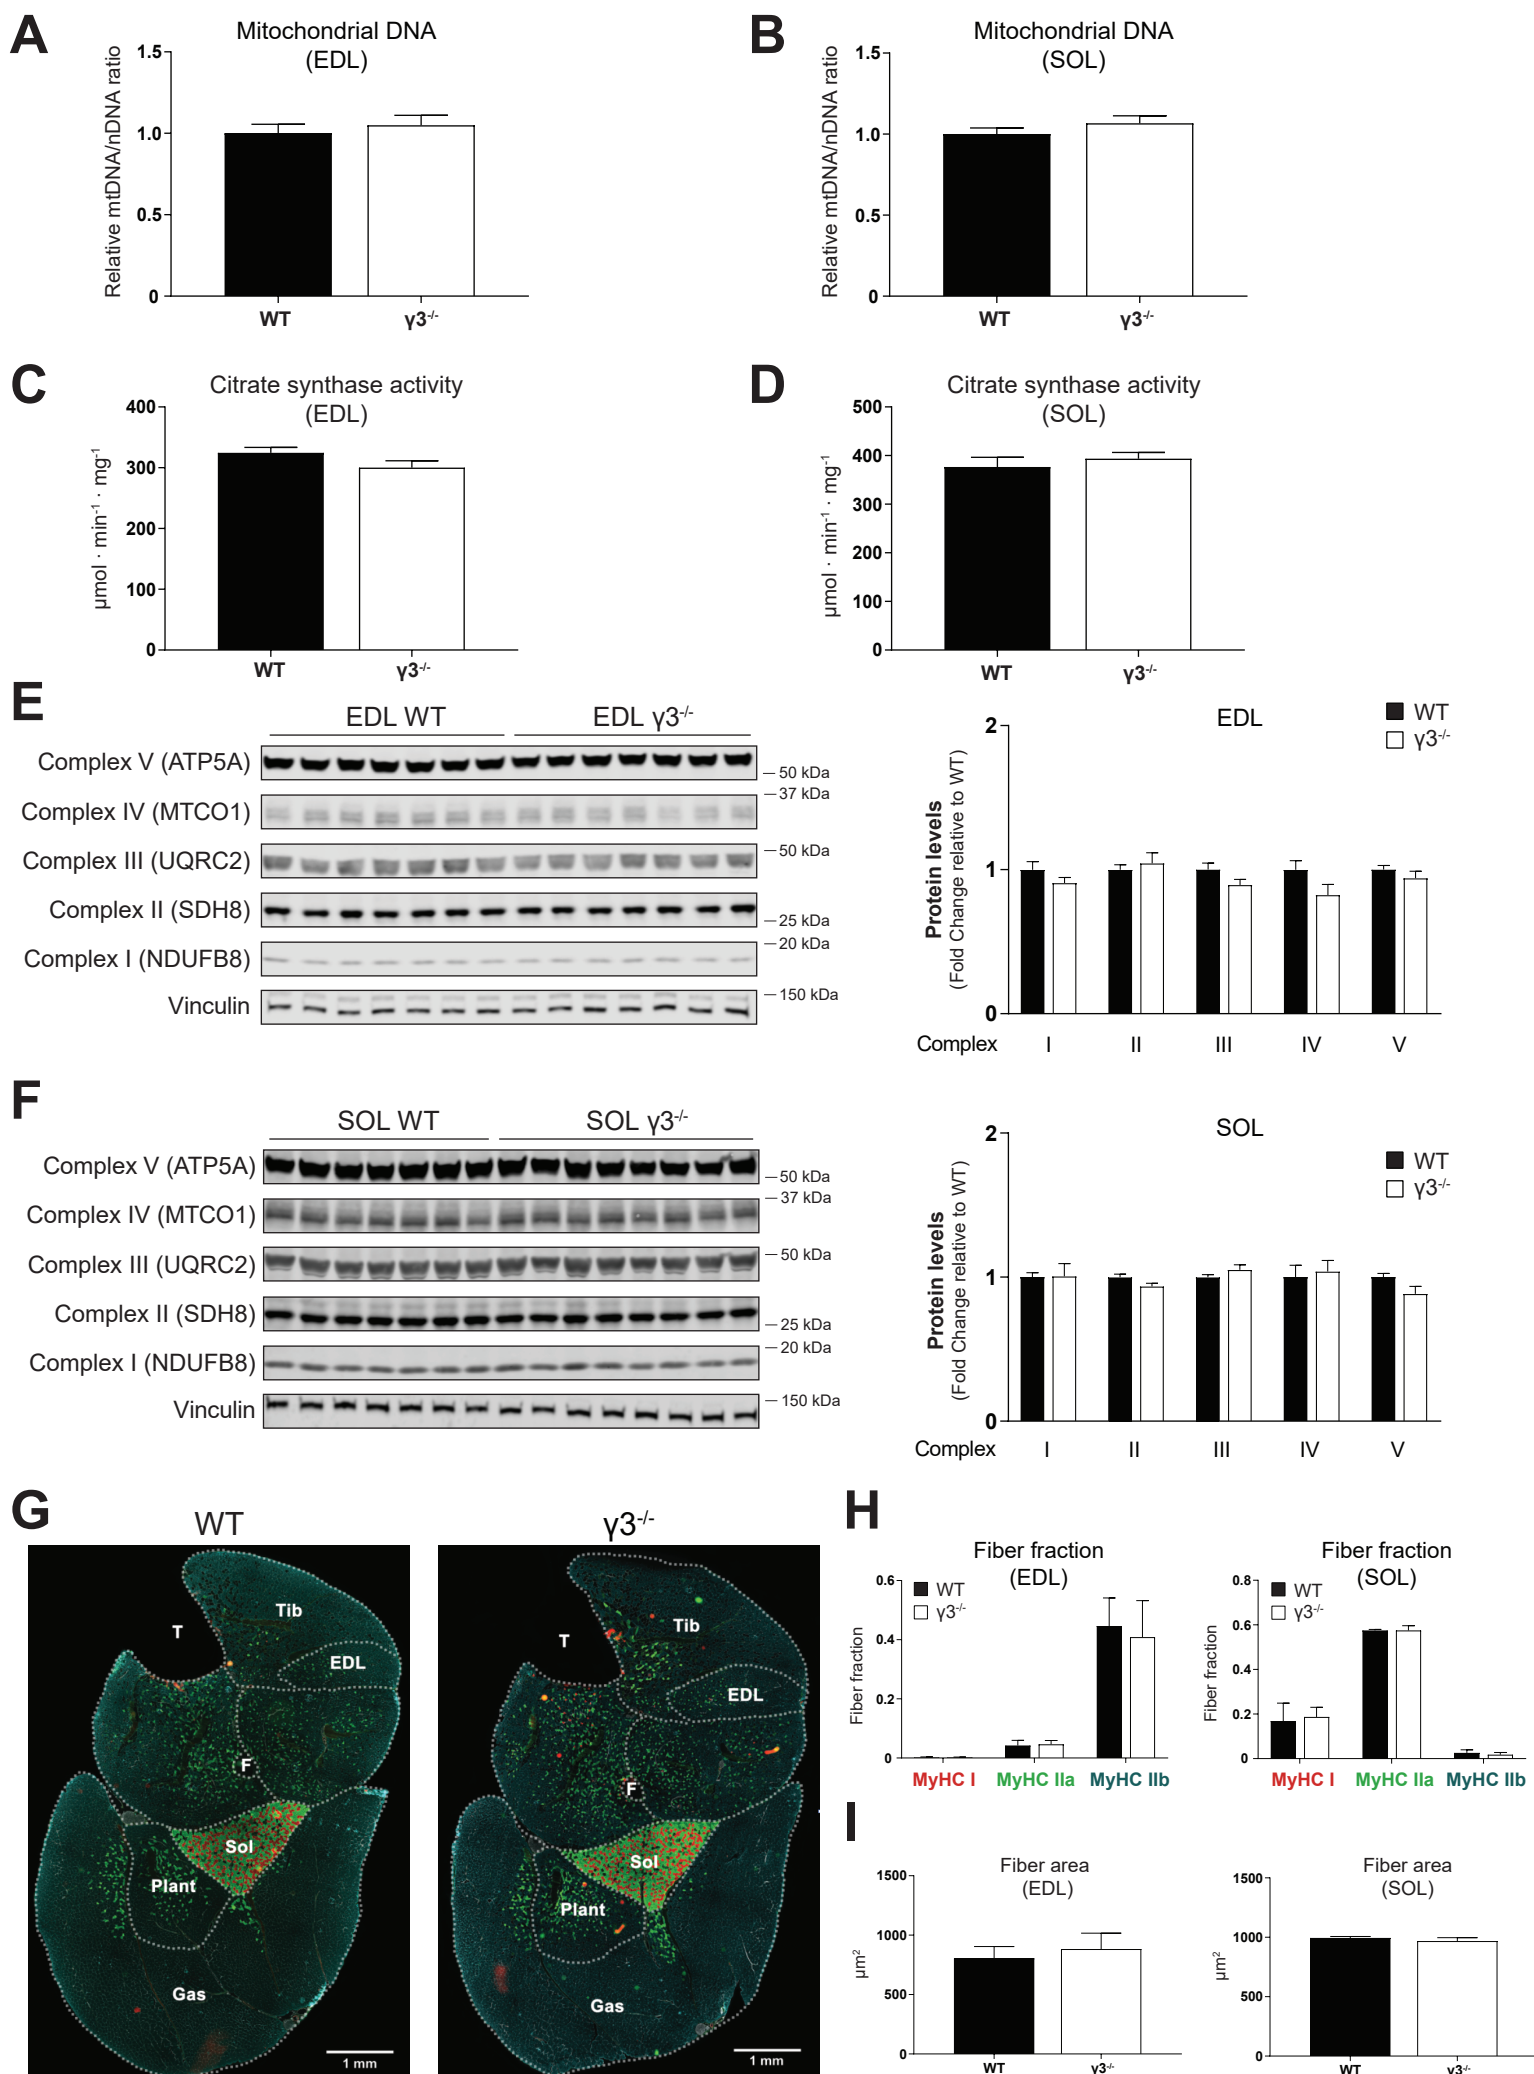

## Figure 3

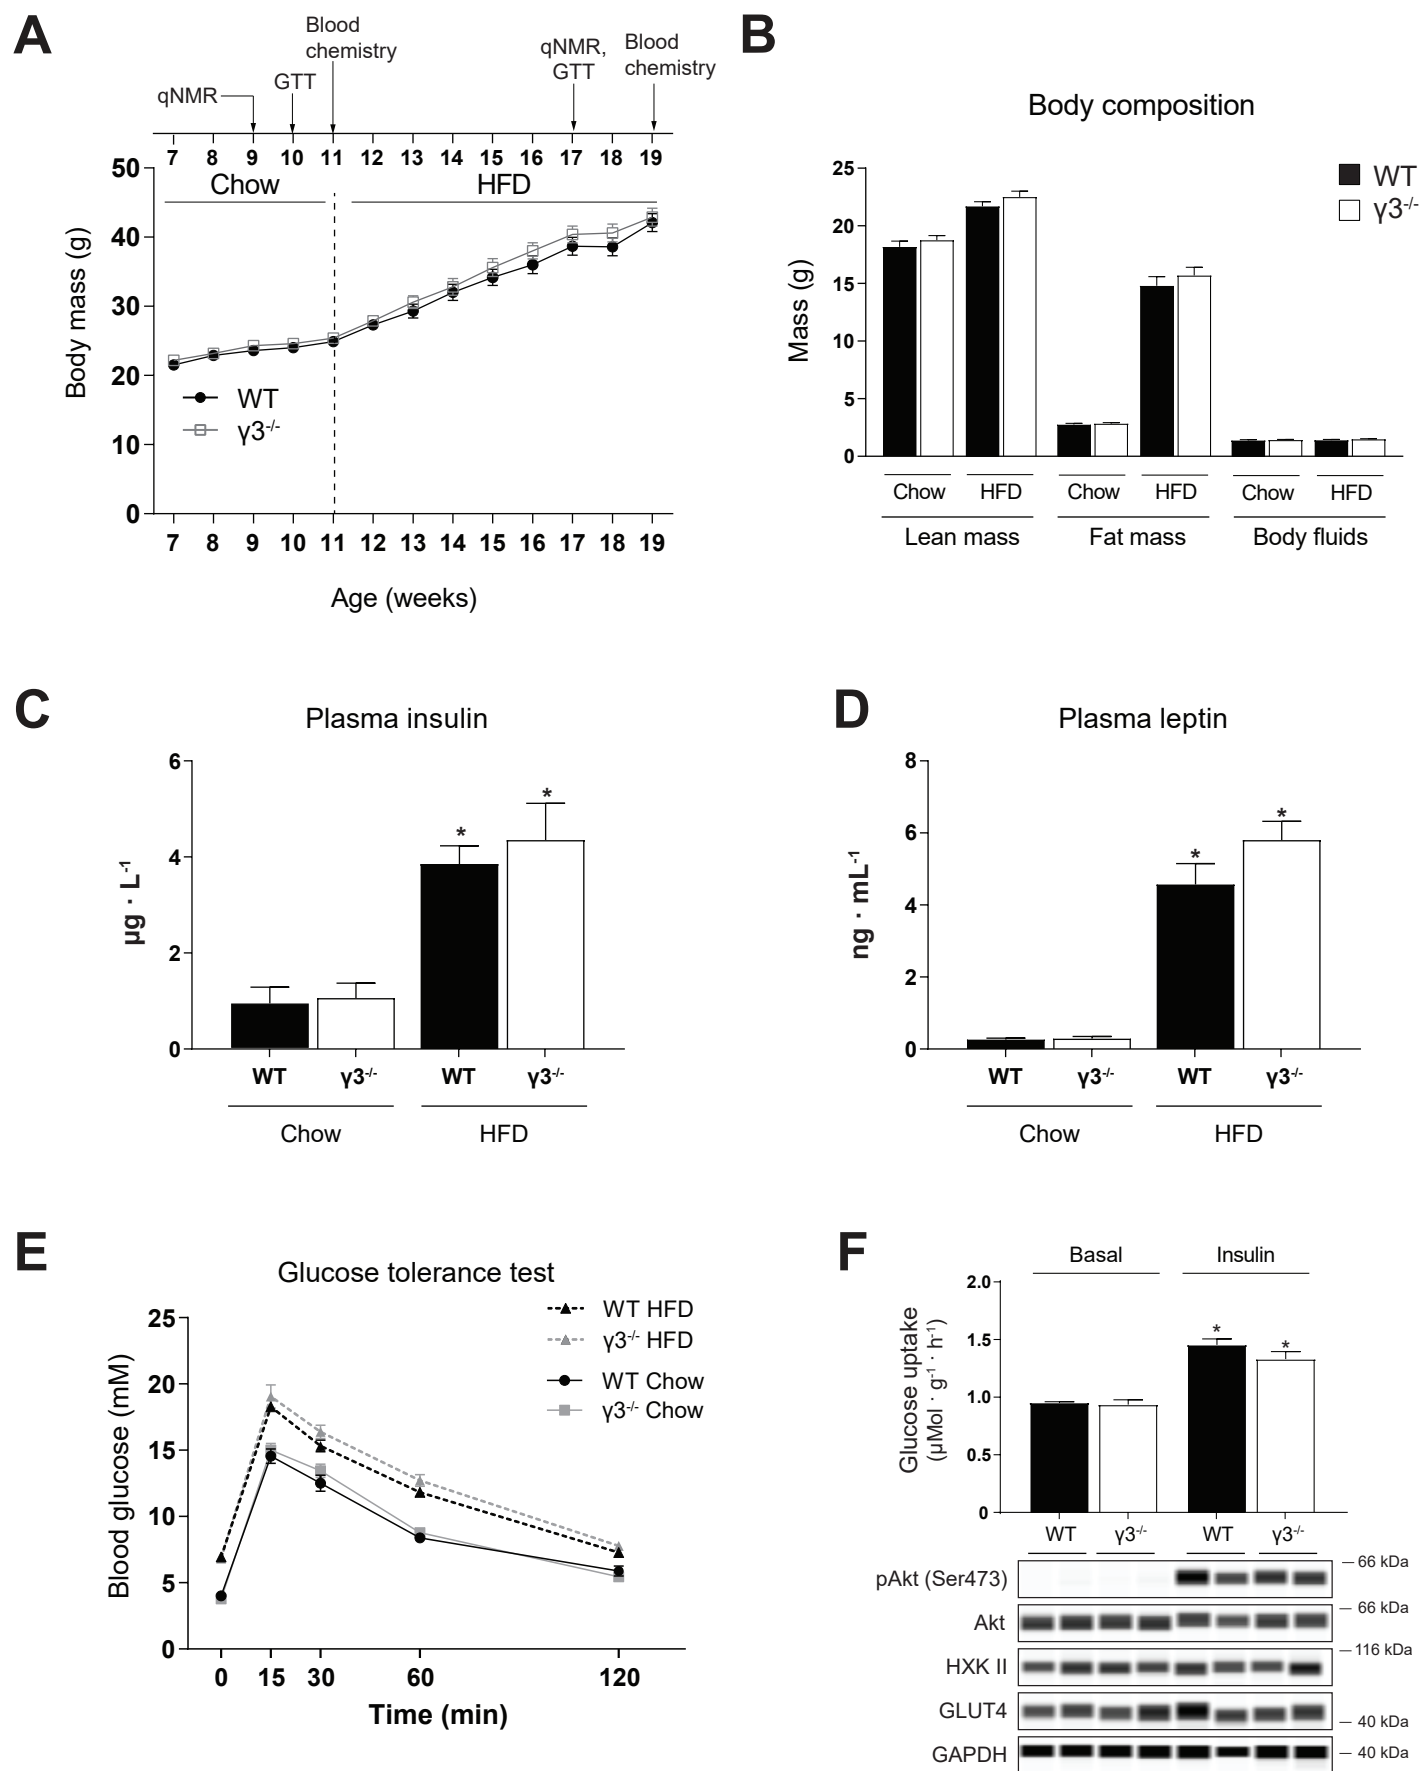

## Figure 4

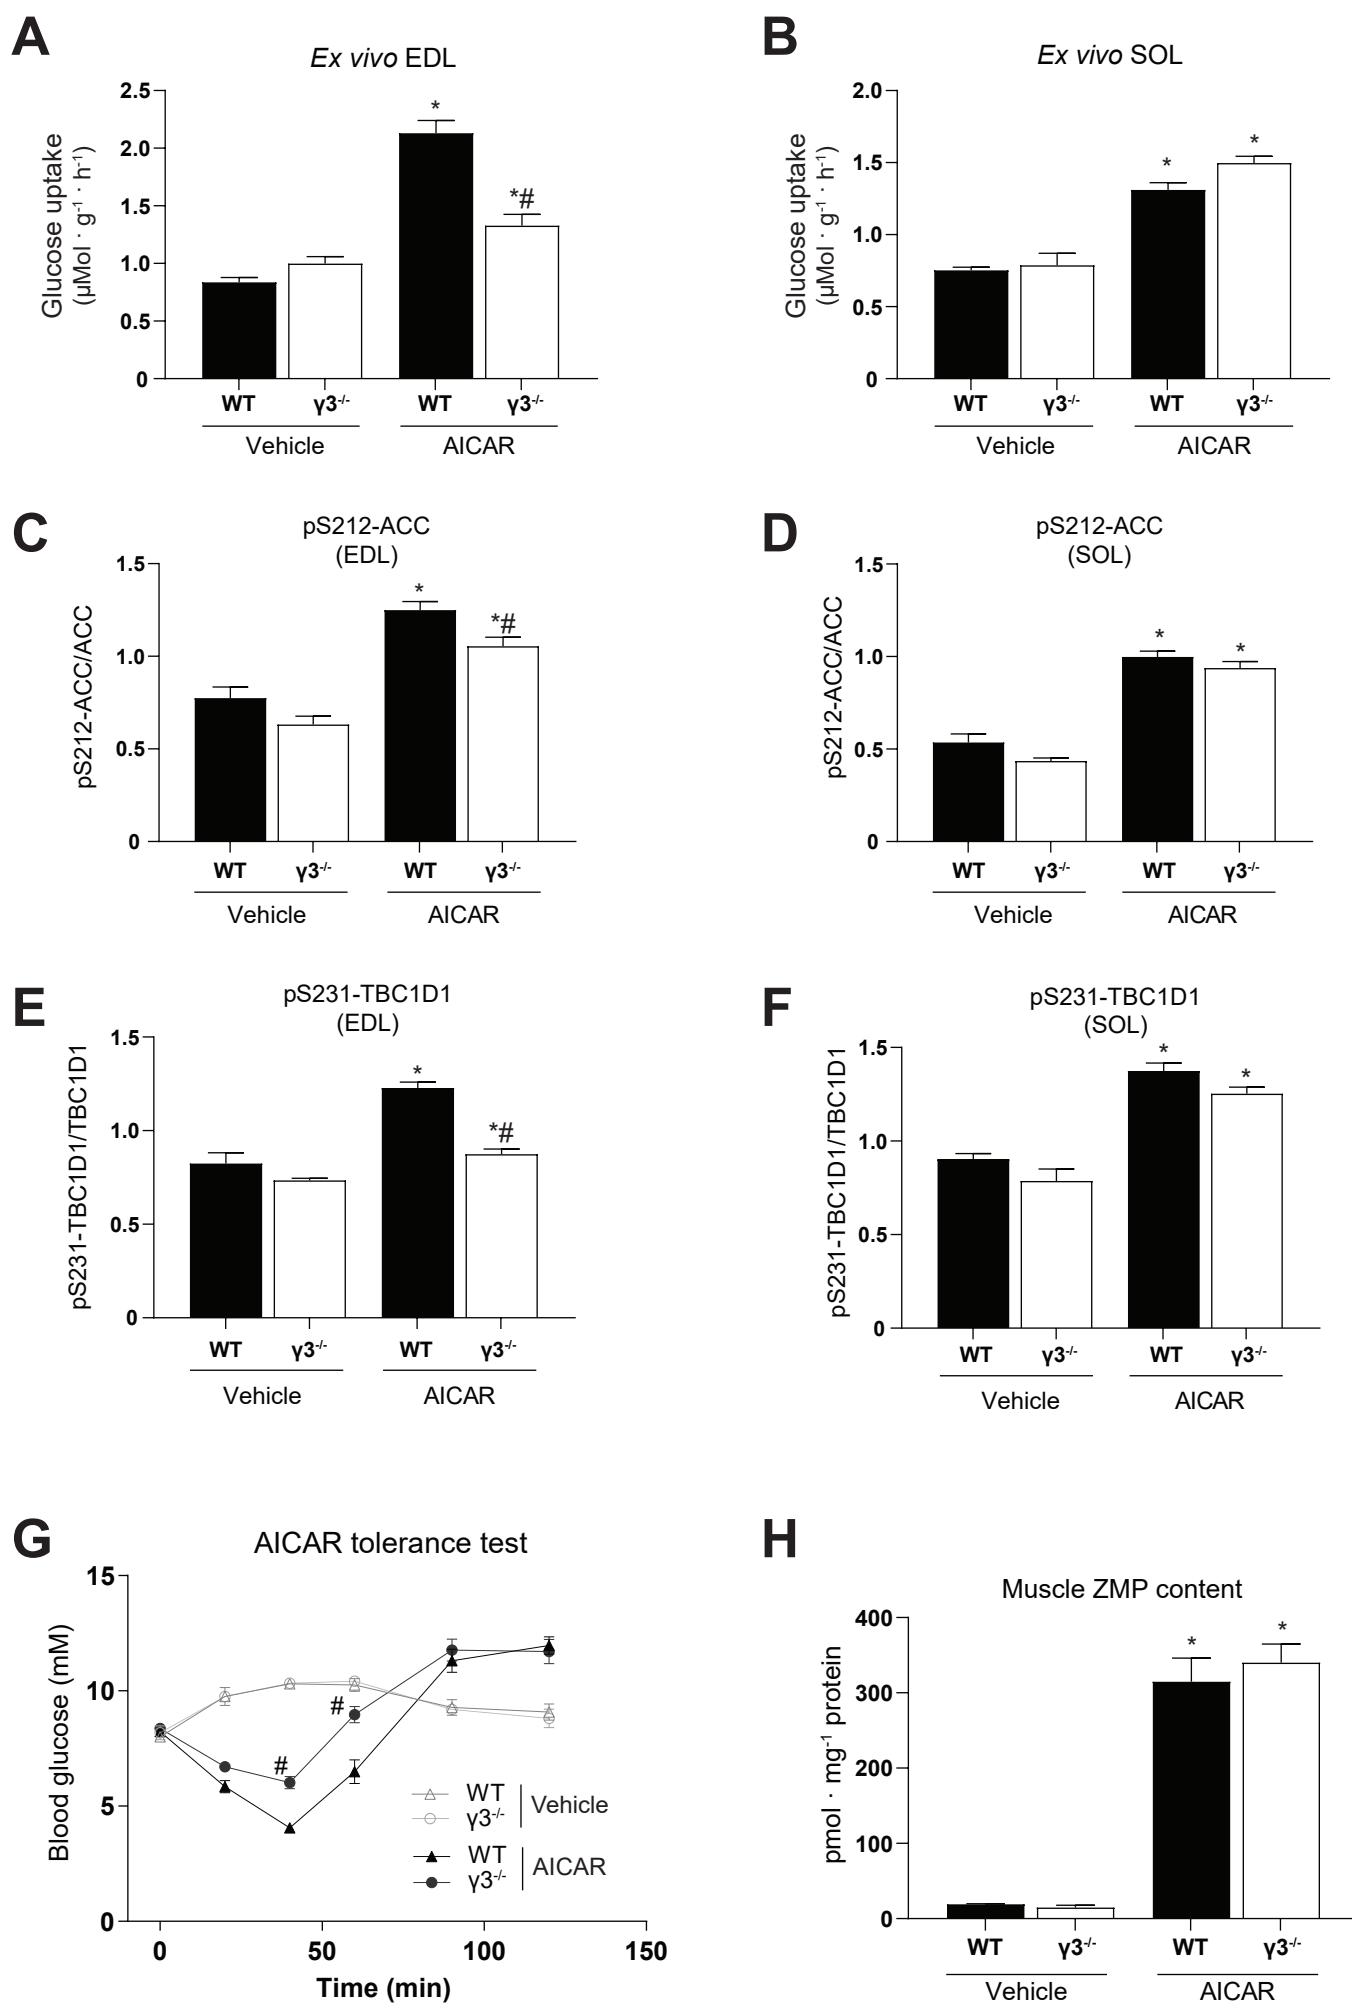

## Figure 5

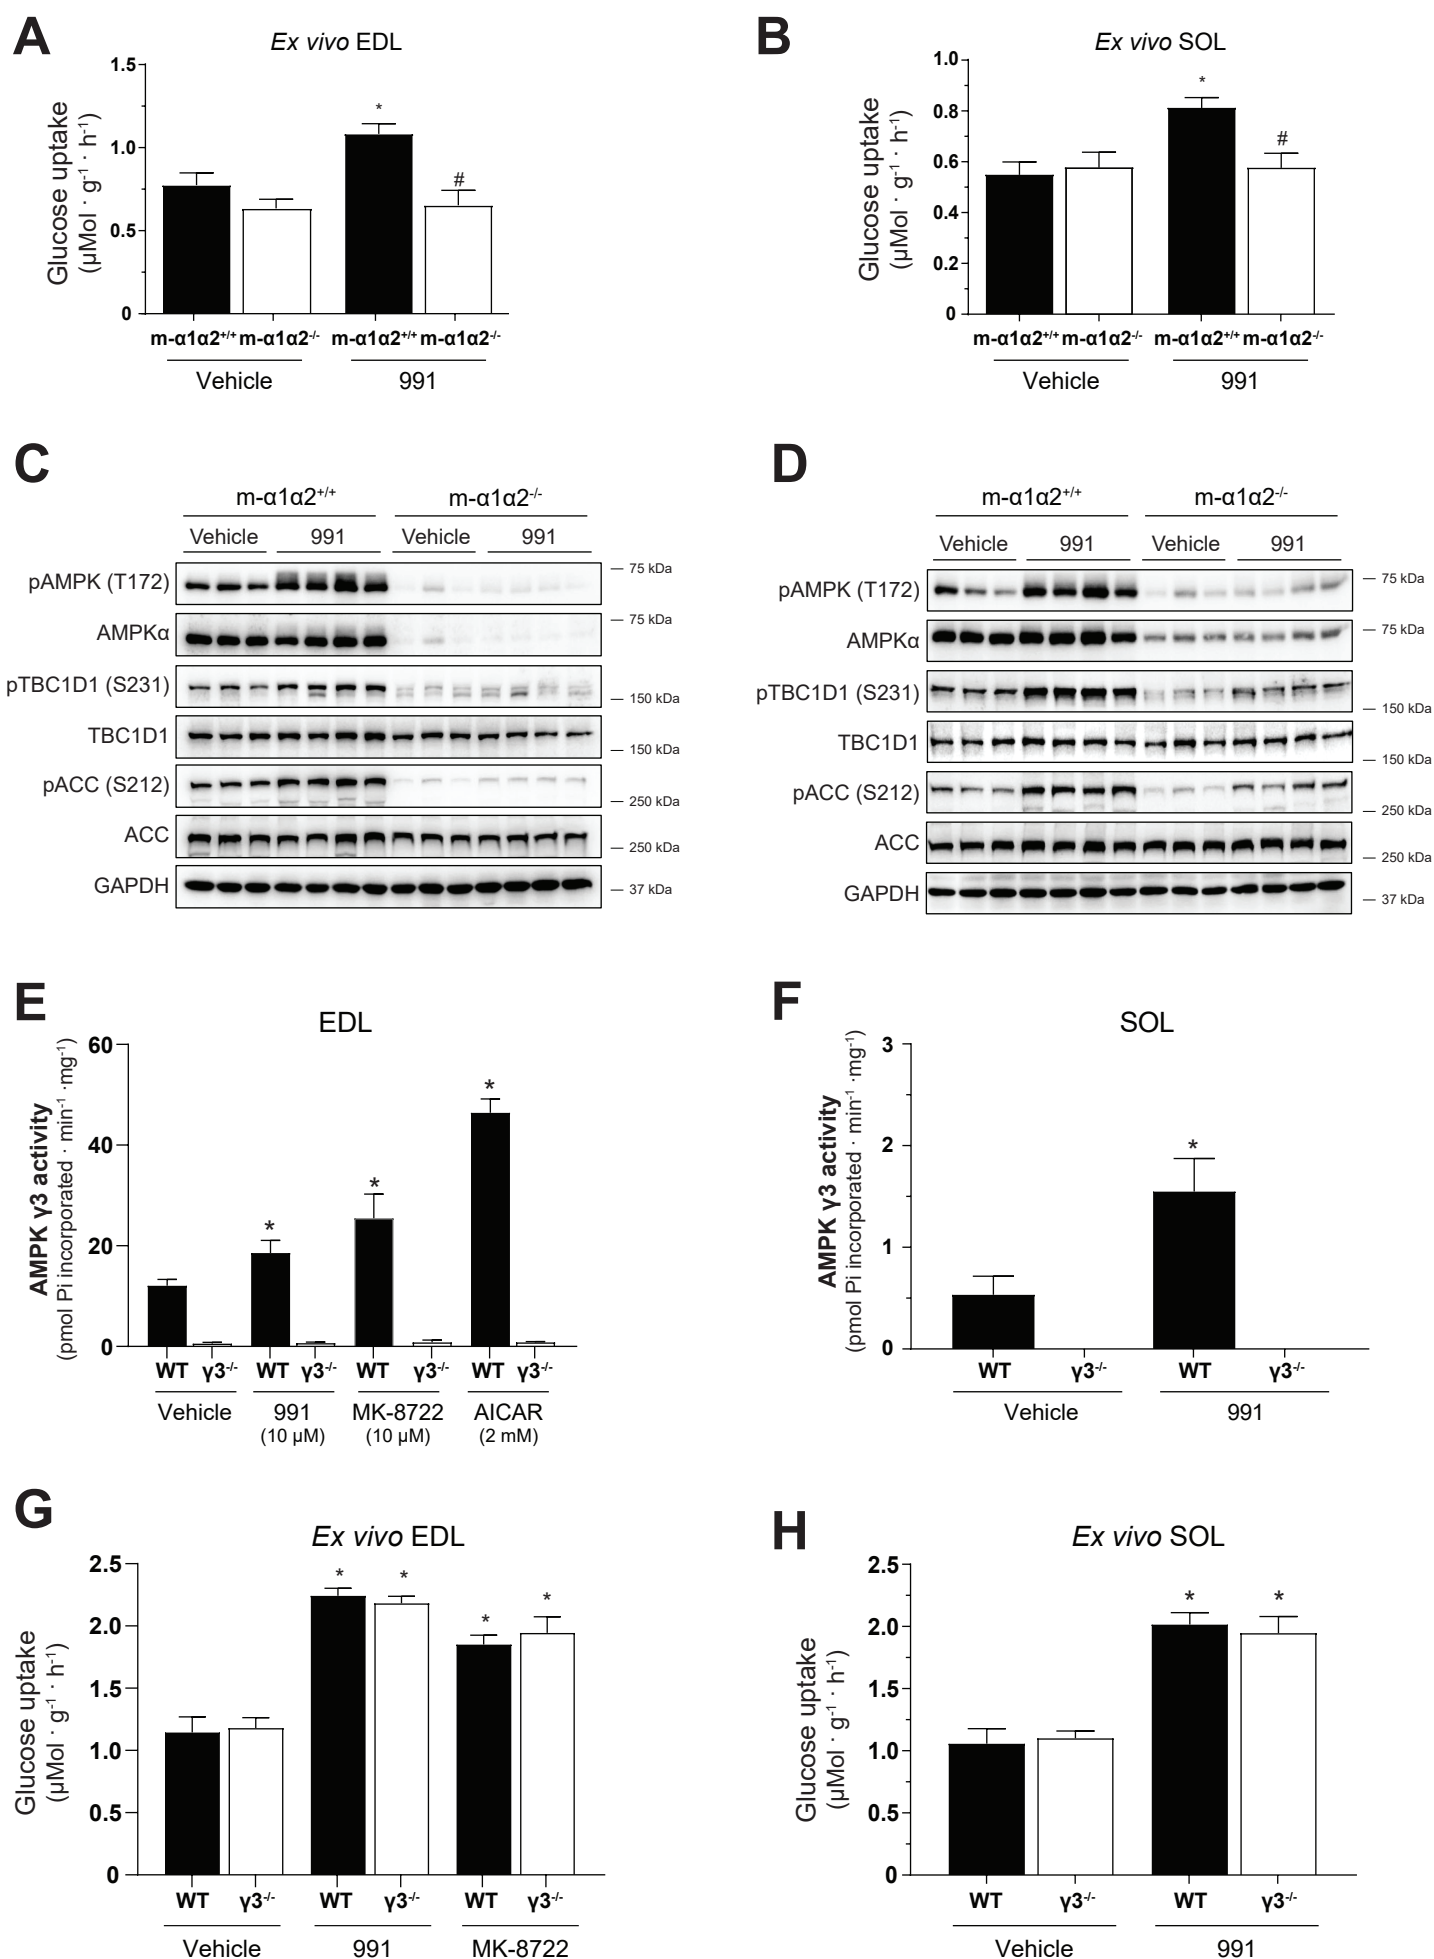

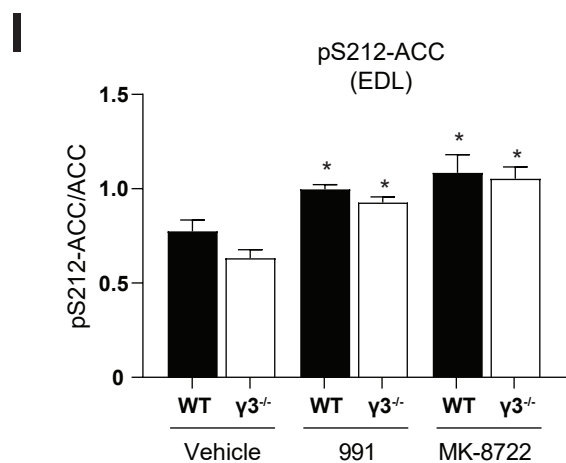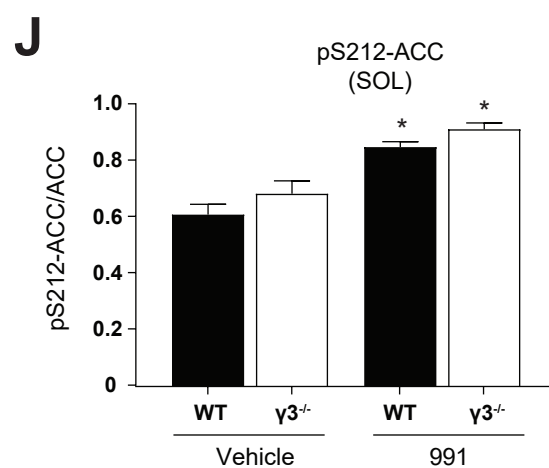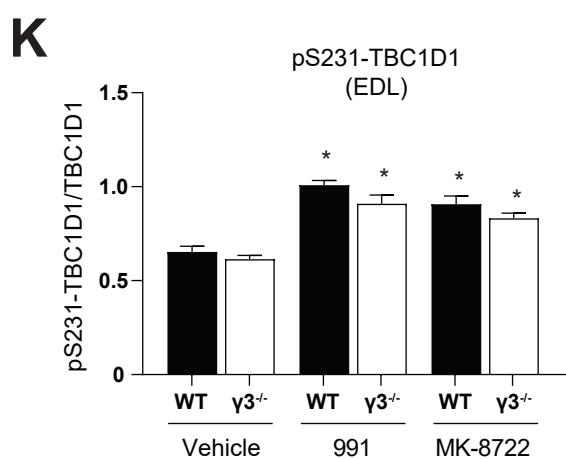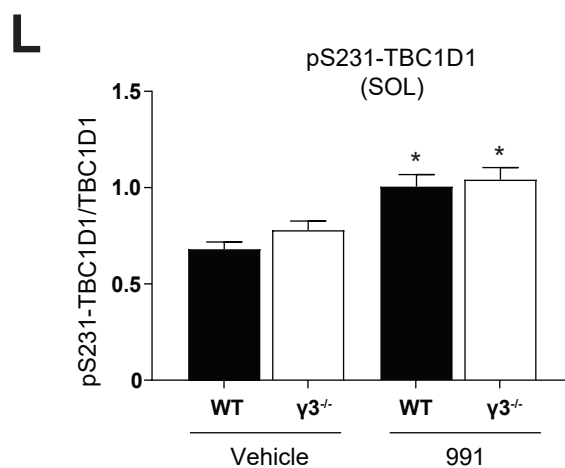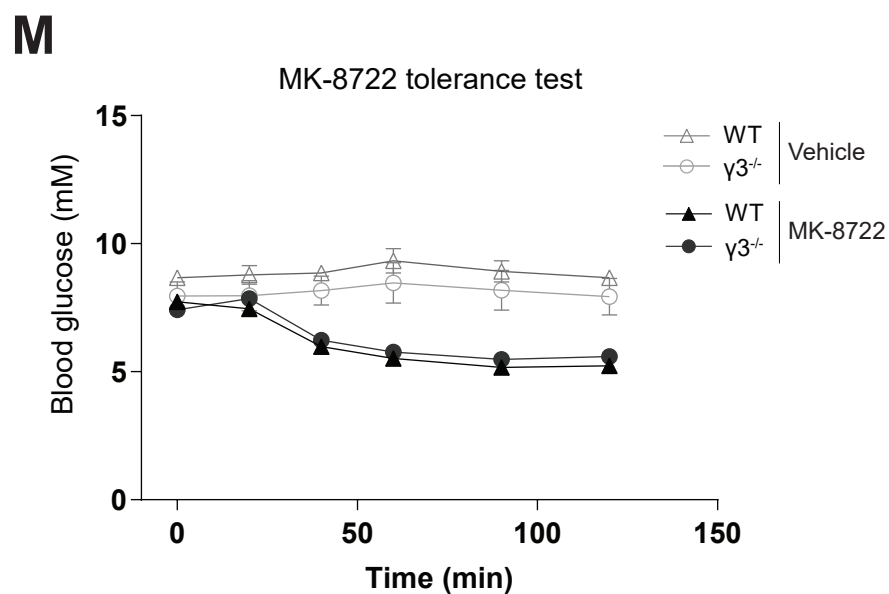

## Figure 6

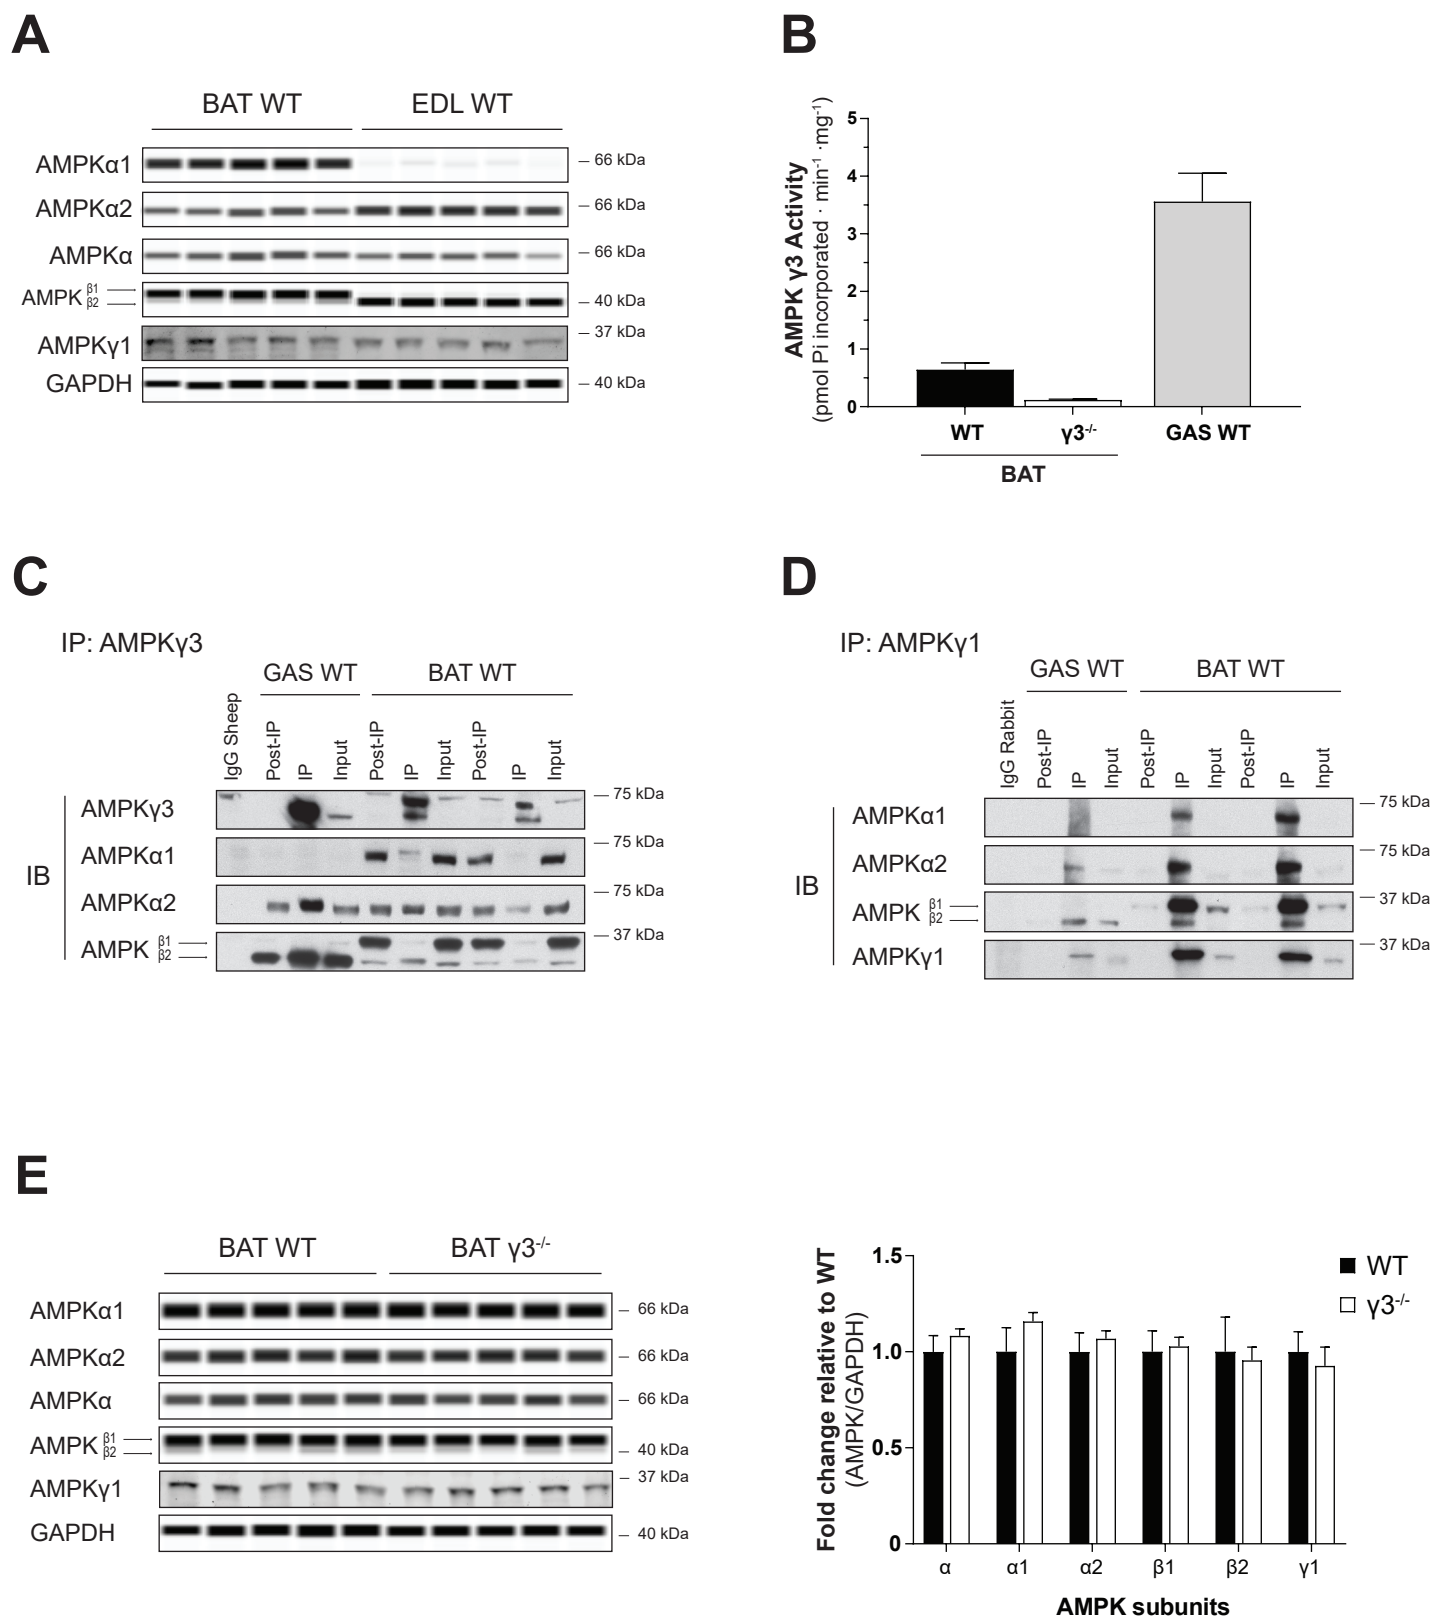



## Figure 7

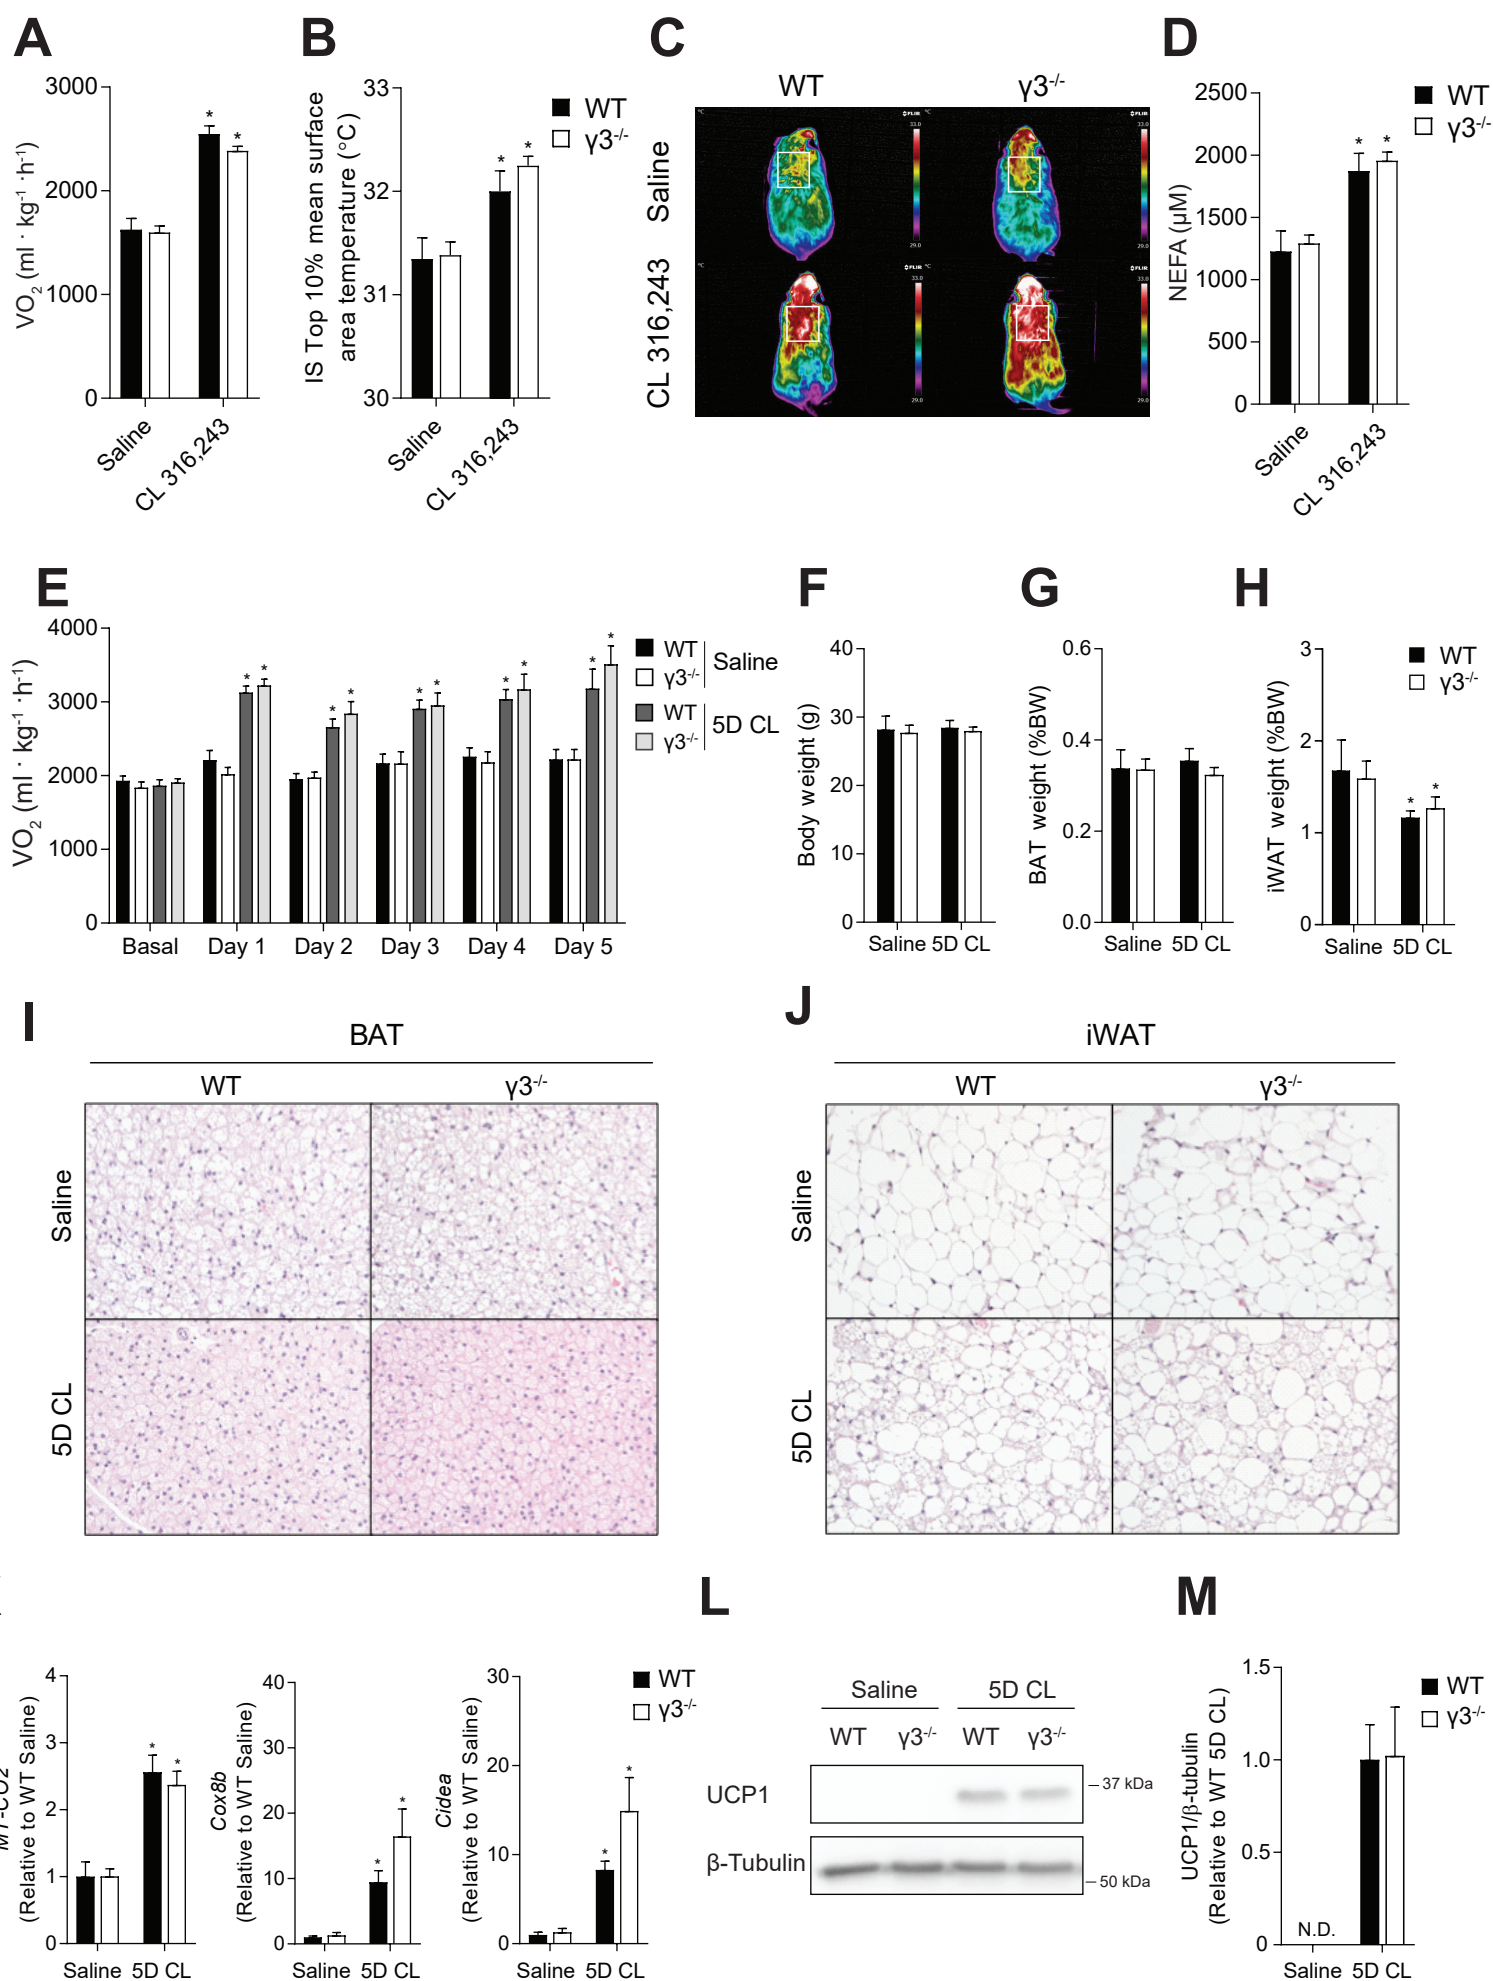

# Supplementary Figure 1

## A

Mouse genomic locus

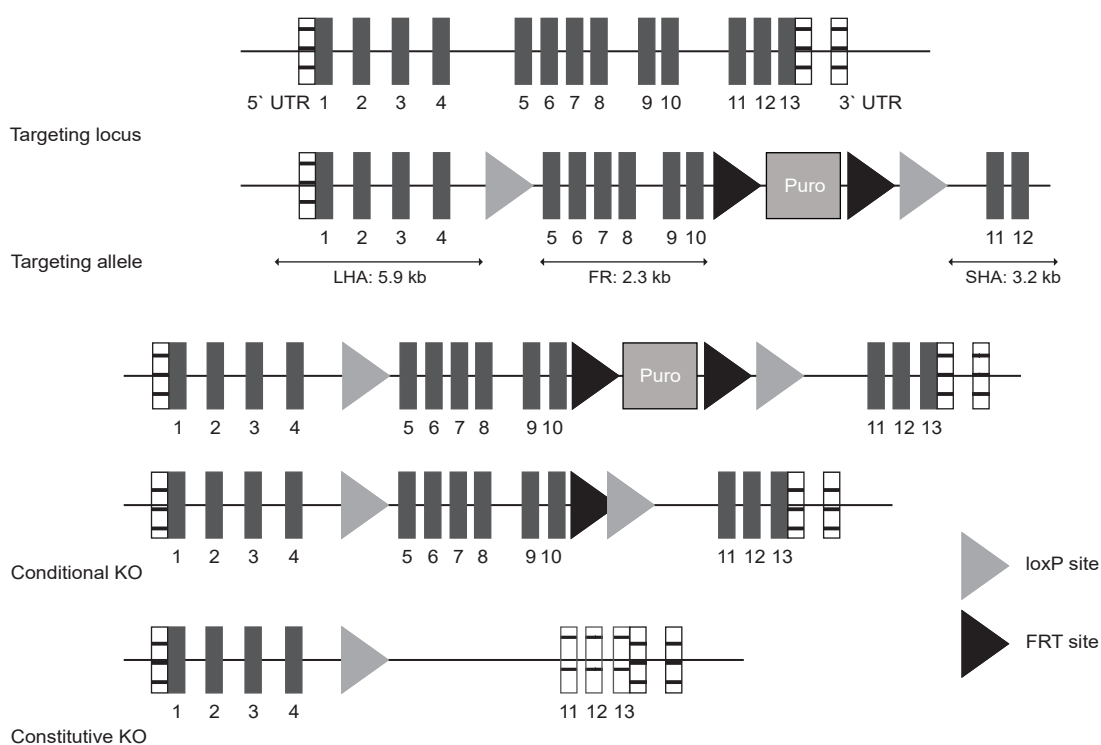

## B

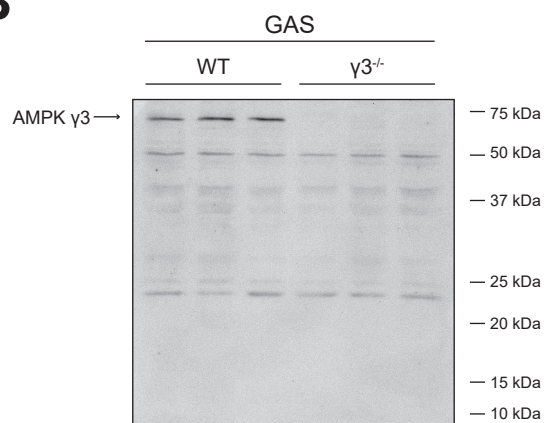

## C

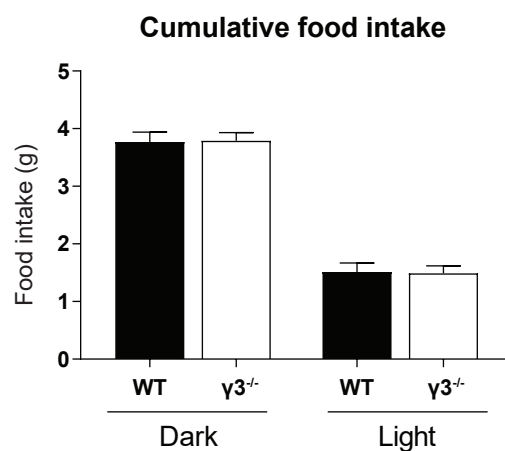

## D

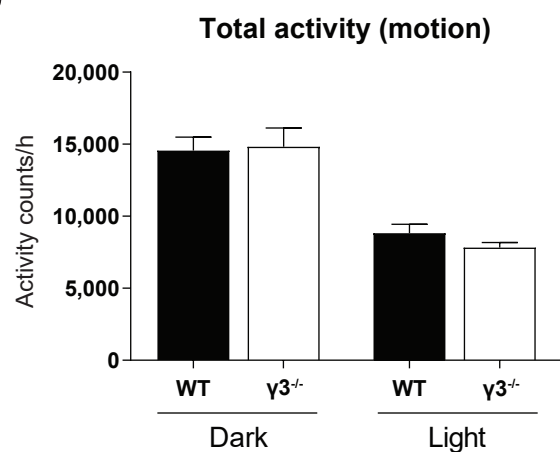

## E

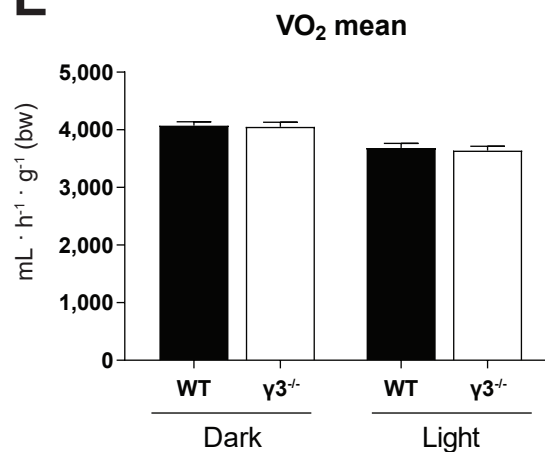

## Supplementary Figure 2

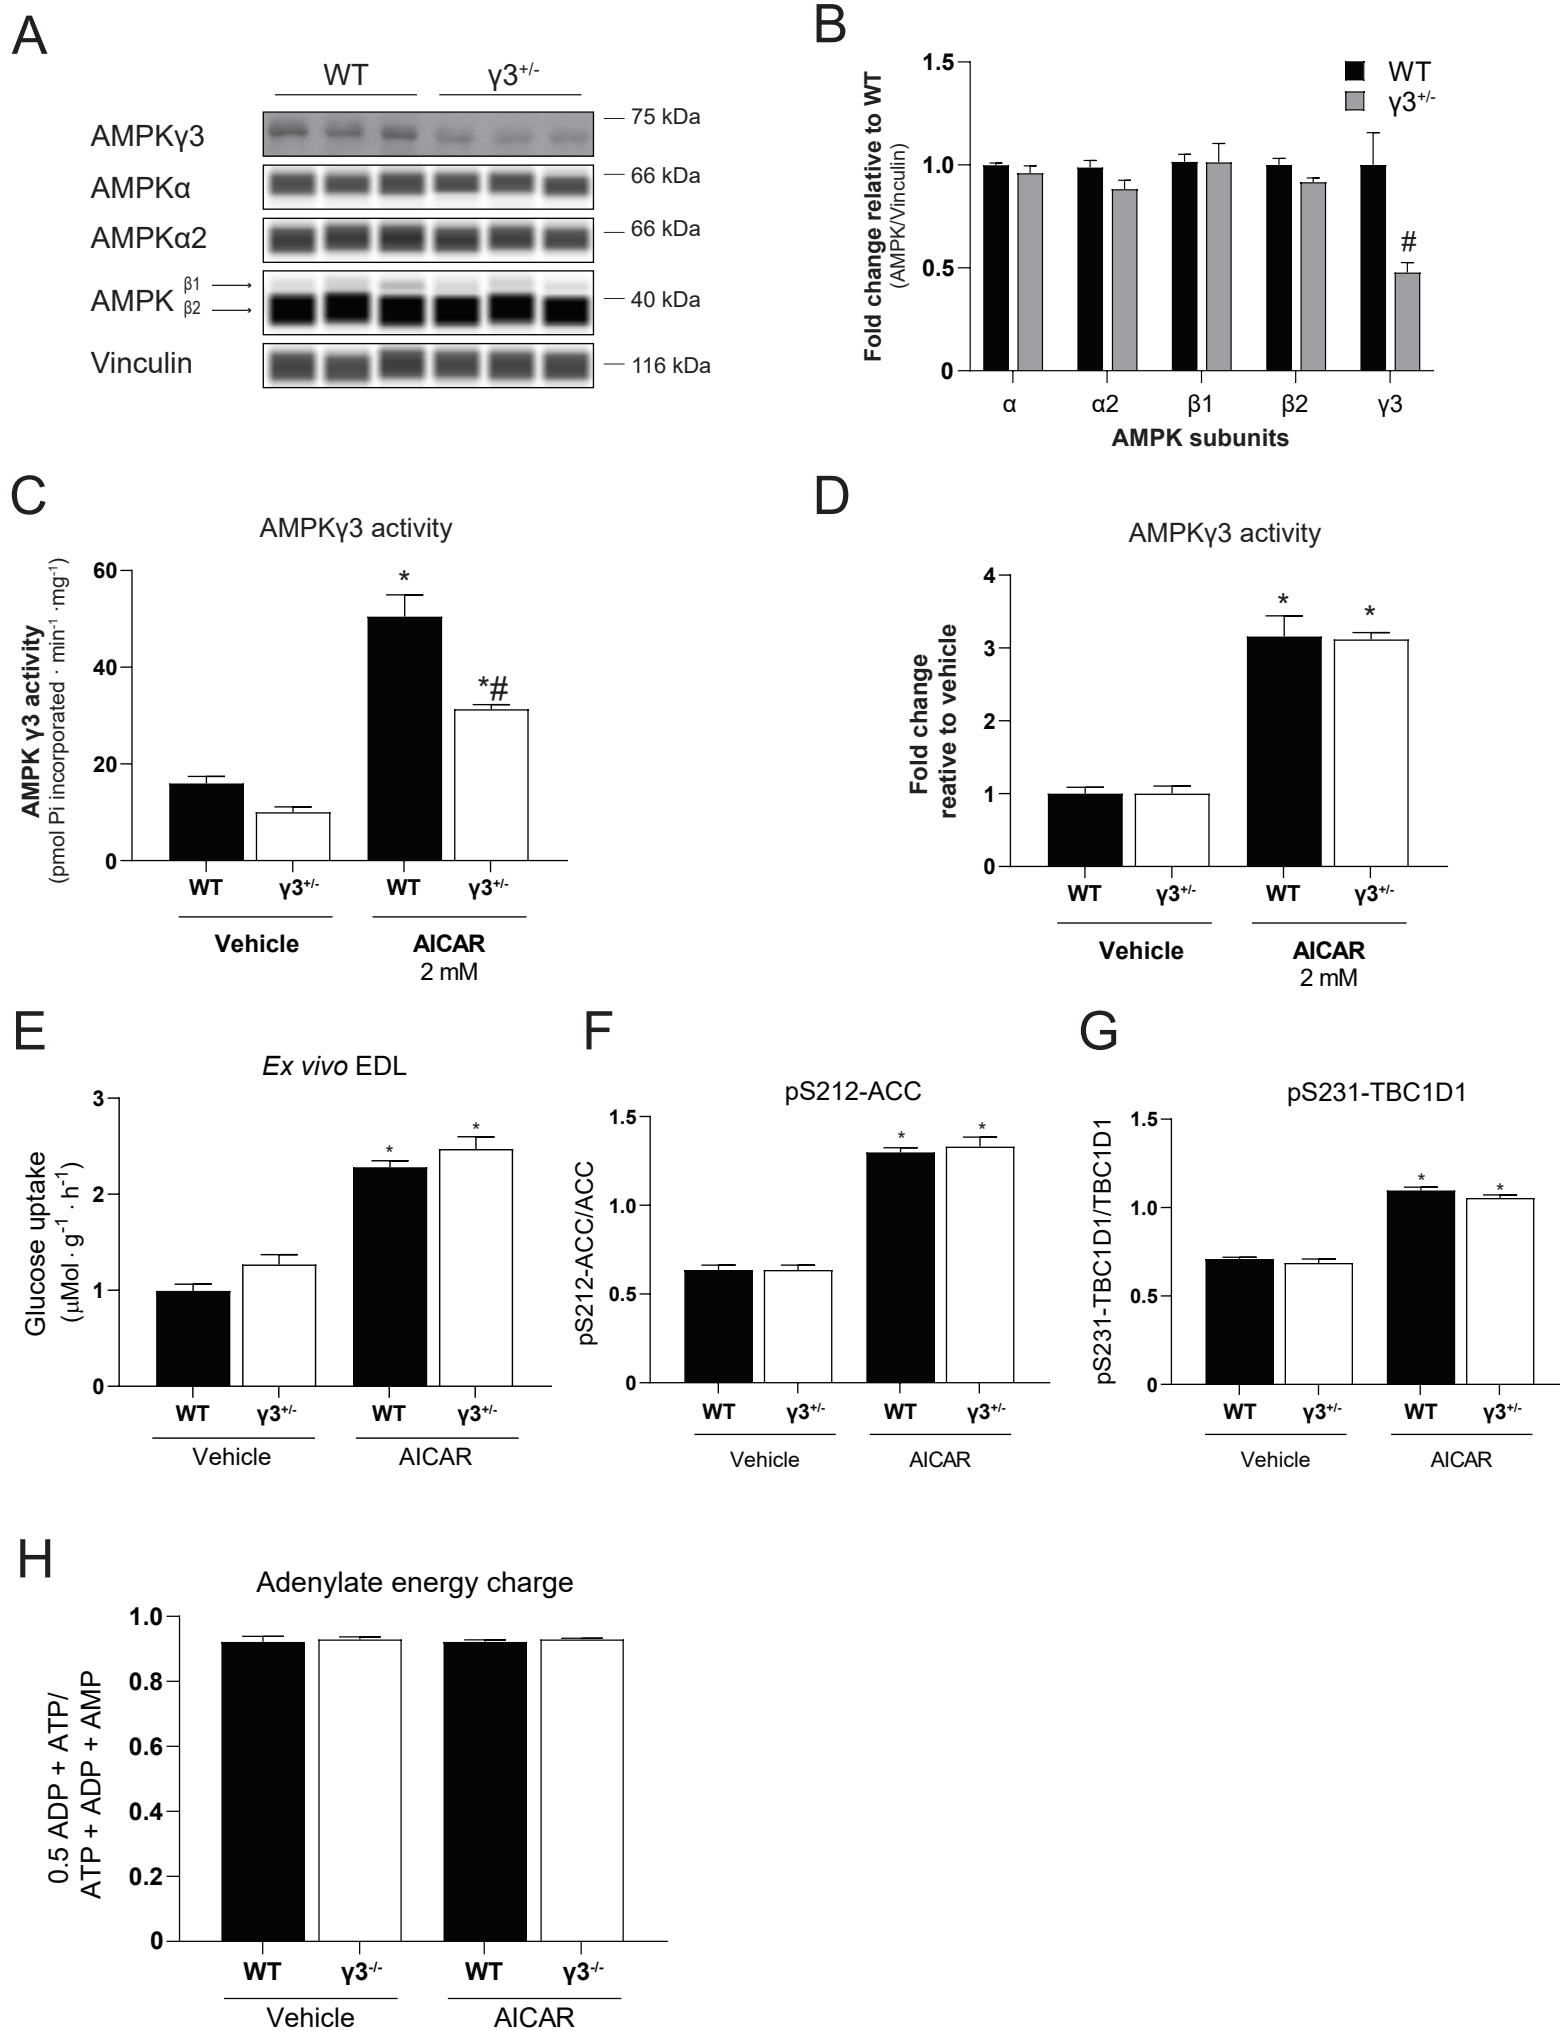

## Supplementary Figure 3

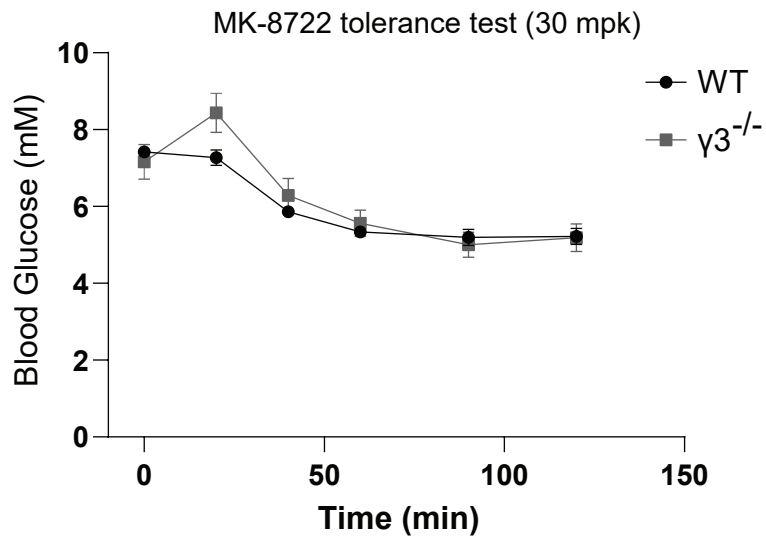

Source: https://www.biorxiv.org/content/10.1101/2021.03.05.433354v1.full.pdf
